# Supplementary material
Source: PubMed Central journal article supplement (PMC3744751)

# THE LANCET

## **Supplementary appendix**

This appendix formed part of the original submission and has been peer reviewed. We post it as supplied by the authors.

Supplement to: Adair LS, Fall CHD, Osmond C, et al. Associations of linear growth and relative weight gain during early life with adult health and human capital in countries of low and middle income: findings from five birth cohort studies. *Lancet* 2013; published online March 28. [http://dx.doi.org/10.1016/S0140-6736\(13\)60103-8](http://dx.doi.org/10.1016/S0140-6736(13)60103-8).

## **Supplemental Tables**

Table 1, Page 2. Baseline characteristics of those included vs excluded from analytic samples.

Table 2, Page 5. BMI

Table 3, Page 6. Overweight or obesity

Table 4, Page 7. Fat mass

Table 5, Page 8. Fat-free mass

Table 6, Page 9. Percent body fat

Table 7, Page 10. Waist circumference

Table 8, Page 11. SBP

Table 9, Page 12. DBP

Table 10, Page 13. Elevated BP

Table 11, Page 14. Log Glucose

Table 12, Page 15. Dysglycemia

Table 13, Page 16. Height

Table 14, Page 17. Short stature

Table 15, Page 18. Schooling

Table 16, Page 19. Failure to complete high school

Table 17, Page 20. Gram and centimeter equivalents of conditional size variables used in the analysis

## **Supplemental Figures**

Figure 1, Page 21 Percentage body fat

Figure 2, Page 22 Waist circumference

Figure 3, Page 23 Diastolic Blood Pressure

**Table 1. Characteristics of COHORTS participants included in the analytic sample or excluded owing, missing birth data or adult outcome data**

|                            | Have adult outcomes, lack complete anthropometry (n=2380 for all sites) |       |      |                      | Analytic sample: have adult outcome and complete anthropometry (n=8296 for all sites) |       |      |                      | Have birth weight, lack adult outcomes (n=9207 for all sites) |       |     |
|----------------------------|-------------------------------------------------------------------------|-------|------|----------------------|---------------------------------------------------------------------------------------|-------|------|----------------------|---------------------------------------------------------------|-------|-----|
|                            | N                                                                       | Mean  | SD   | p-value <sup>1</sup> | N                                                                                     | Mean  | SD   | p-value <sup>2</sup> | N                                                             | Mean  | SD  |
| <b>Brazil</b>              |                                                                         |       |      |                      |                                                                                       |       |      |                      |                                                               |       |     |
| <i>Birth Measures</i>      |                                                                         |       |      |                      |                                                                                       |       |      |                      |                                                               |       |     |
| Maternal Education (years) | 860                                                                     | 6.2   | 4.1  |                      | 3583                                                                                  | 6.6   | 4.2  |                      | 1362                                                          | 6.5   | 4.4 |
| Maternal Height (cm)       | 860                                                                     | 156.6 | 6.0  |                      | 3583                                                                                  | 156.5 | 6.0  |                      | 1362                                                          | 156.3 | 6.1 |
| Wealth Index               | 860                                                                     | 3.2   | 1.0  |                      | 3583                                                                                  | 3.3   | 1.2  |                      | 1362                                                          | 3.2   | 1.1 |
| Birth Weight (g)           | 860                                                                     | 3216  | 537  |                      | 3583                                                                                  | 3231  | 518  | p<0.0001             | 1362                                                          | 3060  | 678 |
| Gestational Age (weeks)    | 686                                                                     | 39.4  | 1.6  |                      | 2886                                                                                  | 39.4  | 1.8  | p<0.0001             | 1024                                                          | 39.0  | 2.4 |
| <i>Adult Measures</i>      |                                                                         |       |      |                      |                                                                                       |       |      |                      |                                                               |       |     |
| Systolic BP (mmHg)         | 607                                                                     | 118.3 | 14.5 |                      | 3580                                                                                  | 117.6 | 15.1 |                      |                                                               |       |     |
| Glucose (log of mmol/L)    | 527                                                                     | 1.6   | 0.1  |                      | 3084                                                                                  | 1.6   | 0.1  |                      |                                                               |       |     |
| Height (cm)                | 602                                                                     | 167.2 | 9.4  |                      | 3583                                                                                  | 167.7 | 9.2  |                      |                                                               |       |     |
| BMI (kg/m <sup>2</sup> )   | 601                                                                     | 23.6  | 4.2  |                      | 3583                                                                                  | 23.6  | 4.4  |                      |                                                               |       |     |
| Schooling (years)          | 592                                                                     | 9.0   | 3.3  |                      | 3381                                                                                  | 9.4   | 3.1  |                      |                                                               |       |     |
| <b>Guatemala</b>           |                                                                         |       |      |                      |                                                                                       |       |      |                      |                                                               |       |     |
| <i>Birth Measures</i>      |                                                                         |       |      |                      |                                                                                       |       |      |                      |                                                               |       |     |
| Maternal Education (years) | 370                                                                     | 1.3   | 1.5  |                      | 298                                                                                   | 1.3   | 1.5  |                      | 305                                                           | 1.3   | 1.3 |
| Maternal Height (cm)       | 370                                                                     | 148.8 | 5.0  |                      | 298                                                                                   | 148.6 | 5.0  |                      | 305                                                           | 148.8 | 5.4 |
| Wealth Index               | 370                                                                     | -0.2  | 0.8  |                      | 298                                                                                   | -0.2  | 0.9  |                      | 305                                                           | -0.1  | 0.7 |
| Birth Weight (g)           | 370                                                                     | 3050  | 446  |                      | 298                                                                                   | 3055  | 483  |                      | 305                                                           | 2994  | 550 |
| Gestational Age (weeks)    | 250                                                                     | 39.8  | 2.7  |                      | 279                                                                                   | 39.4  | 3.1  |                      | 219                                                           | 39.1  | 3.0 |
| <i>Adult Measures</i>      |                                                                         |       |      |                      |                                                                                       |       |      |                      |                                                               |       |     |
| Systolic BP (mmHg)         | 332                                                                     | 110.7 | 11.9 |                      | 285                                                                                   | 112.8 | 11.5 |                      |                                                               |       |     |
| Glucose (log of mmol/L)    | 249                                                                     | 1.6   | 0.1  |                      | 227                                                                                   | 1.6   | 0.1  |                      |                                                               |       |     |
| Height (cm)                | 254                                                                     | 156.1 | 8.2  |                      | 298                                                                                   | 157.4 | 8.2  |                      |                                                               |       |     |
| BMI (kg/m <sup>2</sup> )   | 254                                                                     | 25.2  | 4.1  |                      | 298                                                                                   | 25.4  | 4.2  |                      |                                                               |       |     |
| Schooling (years)          | 347                                                                     | 5.2   | 3.2  |                      | 294                                                                                   | 4.9   | 3.5  |                      |                                                               |       |     |

**Table 1, con't. Characteristics of COHORTS participants included in the analytic sample or excluded owing, missing birth data or adult outcome data**

|                            | Have adult outcomes, lack complete anthropometry |             |           |                            | Analytic sample:<br>have adult outcome and complete anthropometry |             |           |                            | Have birth weight, lack adult outcomes |             |           |
|----------------------------|--------------------------------------------------|-------------|-----------|----------------------------|-------------------------------------------------------------------|-------------|-----------|----------------------------|----------------------------------------|-------------|-----------|
| <b>India</b>               | <b>N</b>                                         | <b>Mean</b> | <b>SD</b> | <b>p-value<sup>1</sup></b> | <b>N</b>                                                          | <b>Mean</b> | <b>SD</b> | <b>p-value<sup>2</sup></b> | <b>N</b>                               | <b>Mean</b> | <b>SD</b> |
| <i>Birth Measures</i>      |                                                  |             |           |                            |                                                                   |             |           |                            |                                        |             |           |
| Maternal Education (years) | 100                                              | 5.9         | 4.0       |                            | 1324                                                              | 5.6         | 4.3       | p=0.002                    | 3920                                   | 5.1         | 4.6       |
| Maternal Height (cm)       | 99                                               | 151.6       | 4.6       |                            | 1326                                                              | 151.8       | 4.5       |                            | 903                                    | 152.3       | 5.7       |
| Wealth Index               | 100                                              | 4.4         | 1.0       |                            | 1324                                                              | 4.5         | 0.9       | p<0.0001                   | 3920                                   | 4.0         | 1.2       |
| Birth Weight (g)           | 100                                              | 2888        | 415       |                            | 1326                                                              | 2816        | 419       |                            | 5383                                   | 2786        | 449.2     |
| Gestational Age (weeks)    | 92                                               | 39.1        | 2.6       |                            | 1214                                                              | 38.9        | 2.5       |                            | na                                     | na          | na        |
| <i>Adult Measures</i>      |                                                  |             |           |                            |                                                                   |             |           |                            |                                        |             |           |
| Systolic BP (mmHg)         | 100                                              | 112.3       | 12.8      |                            | 1313                                                              | 113.6       | 12.6      |                            |                                        |             |           |
| Glucose (log of mmol/L)    | 94                                               | 1.7         | 0.2       |                            | 1299                                                              | 1.7         | 0.2       |                            |                                        |             |           |
| Height (cm)                | 98                                               | 163.9       | 10.0      |                            | 1326                                                              | 163.5       | 9.4       |                            |                                        |             |           |
| BMI (kg/m <sup>2</sup> )   | 98                                               | 25.1        | 5.2       |                            | 1326                                                              | 24.8        | 4.6       |                            |                                        |             |           |
| Schooling (years)          | 100                                              | 13.3        | 3.5       | p=0.048                    | 1326                                                              | 13.5        | 3.3       |                            |                                        |             |           |
| <b>Philippines</b>         | <b>N</b>                                         | <b>Mean</b> | <b>SD</b> | <b>p-value<sup>1</sup></b> | <b>N</b>                                                          | <b>Mean</b> | <b>SD</b> | <b>p-value<sup>2</sup></b> | <b>N</b>                               | <b>Mean</b> | <b>SD</b> |
| <i>Birth Measures</i>      |                                                  |             |           |                            |                                                                   |             |           |                            |                                        |             |           |
| Maternal Education (years) | 150                                              | 7.7         | 3.6       |                            | 1887                                                              | 7.0         | 3.3       |                            | 992                                    | 7.4         | 3.4       |
| Maternal Height (cm)       | 150                                              | 151.3       | 5.7       |                            | 1887                                                              | 150.6       | 4.9       |                            | 992                                    | 150.6       | 5.1       |
| Wealth Index               | 150                                              | 0.4         | 2.6       | p=0.009                    | 1887                                                              | 0.0         | 2.0       |                            | 991                                    | 0.0         | 2.2       |
| Birth Weight (g)           | 150                                              | 3051        | 430       |                            | 1887                                                              | 3007        | 420       | p=0.075                    | 992                                    | 2946        | 468       |
| Gestational Age (weeks)    | 149                                              | 38.8        | 2.1       |                            | 1871                                                              | 38.8        | 2.1       |                            | 979                                    | 38.7        | 2.2       |
| <i>Adult Measures</i>      |                                                  |             |           |                            |                                                                   |             |           |                            |                                        |             |           |
| Systolic BP (mmHg)         | 119                                              | 104.3       | 12.6      |                            | 1886                                                              | 106.0       | 12.1      |                            |                                        |             |           |
| Glucose (log of mmol/L)    | 97                                               | 1.5         | 0.1       |                            | 1578                                                              | 1.5         | 0.1       |                            |                                        |             |           |
| Height (cm)                | 119                                              | 158.1       | 8.2       |                            | 1887                                                              | 157.4       | 8.2       |                            |                                        |             |           |
| BMI (kg/m <sup>2</sup> )   | 114                                              | 20.4        | 3.0       |                            | 1887                                                              | 20.7        | 3.1       |                            |                                        |             |           |
| Schooling (years)          | 149                                              | 9.7         | 3.7       |                            | 1887                                                              | 10.0        | 2.9       |                            |                                        |             |           |

**Table 1, con't. Characteristics of COHORTS participants included in the analytic sample or excluded owing, missing birth data or adult outcome data**

| South Africa               | Have adult outcomes, lack complete anthropometry |       |      |                      | Analytic sample: have adult outcome and complete anthropometry |       |      |                      | Have birth weight, lack adult outcomes |       |     |
|----------------------------|--------------------------------------------------|-------|------|----------------------|----------------------------------------------------------------|-------|------|----------------------|----------------------------------------|-------|-----|
|                            | N                                                | Mean  | SD   | p-value <sup>1</sup> | N                                                              | Mean  | SD   | p-value <sup>2</sup> | N                                      | Mean  | SD  |
| <i>Birth Measures</i>      |                                                  |       |      |                      |                                                                |       |      |                      |                                        |       |     |
| Maternal Education (years) | 900                                              | 9.8   | 2.7  |                      | 1202                                                           | 9.7   | 2.5  |                      | 1165                                   | 9.3   | 3.3 |
| Maternal Height (cm)       | 900                                              | 158.9 | 5.6  |                      | 1202                                                           | 158.6 | 5.7  |                      | 1165                                   | 159.1 | 2.3 |
| Wealth Index               | 900                                              | 3.9   | 1.5  |                      | 1202                                                           | 4.1   | 1.4  | p<0.0001             | 1165                                   | 3.7   | 1.7 |
| Birth Weight (g)           | 900                                              | 3041  | 513  |                      | 1202                                                           | 3071  | 507  |                      | 1165                                   | 3093  | 518 |
| Gestational Age (weeks)    | 865                                              | 38.2  | 1.9  |                      | 1189                                                           | 38.1  | 1.9  |                      | 1114                                   | 38.2  | 1.9 |
| <i>Adult Measures</i>      |                                                  |       |      |                      |                                                                |       |      |                      |                                        |       |     |
| Systolic BP (mmHg)         | 700                                              | 117.8 | 10.9 |                      | 1169                                                           | 117.5 | 10.6 |                      |                                        |       |     |
| Glucose (log of mmol/L)    | 470                                              | 1.5   | 0.1  |                      | 719                                                            | 1.5   | 0.1  |                      |                                        |       |     |
| Height (cm)                | 729                                              | 165.5 | 8.9  |                      | 1202                                                           | 165.0 | 8.9  |                      |                                        |       |     |
| BMI (kg/m <sup>2</sup> )   | 728                                              | 21.6  | 4.0  |                      | 1202                                                           | 21.9  | 4.3  |                      |                                        |       |     |
| Schooling (years)          | 865                                              | 11.0  | 1.6  |                      | 1169                                                           | 11.1  | 1.4  |                      |                                        |       |     |

1. P values reported if <0.10, based on Bonferroni-adjusted comparison of analytic sample and sample with adult outcomes, but missing complete anthropometry.

2. P values reported if <0.10, based on Bonferroni-adjusted comparison of analytic sample and sample with birth weight, but missing adult outcomes.

**Table 2. Association of birth weight (BW), conditional relative weight (CWh), and conditional height (CH) at age 2 y and mid-childhood (MC) with adult BMI (kg/m<sup>2</sup>).  $\beta$ -coefficients and 95% confidence intervals from linear regression models stratified by site and sex, stratified by sex and adjusted for site, and pooled with adjustment for site and sex.**

|                                                     |          | BW                     | CWh-2y                 | CWh-MC                 | CH-2y                  | CH-MC                  | N    | R <sup>2</sup> |
|-----------------------------------------------------|----------|------------------------|------------------------|------------------------|------------------------|------------------------|------|----------------|
| <b>Brazil</b>                                       | <b>M</b> | 0.53***<br>(0.35,0.70) | 0.91***<br>(0.73,1.08) | 1.44***<br>(1.27,1.61) | 0.46***<br>(0.29,0.63) | 0.31***<br>(0.14,0.48) | 1882 | 0.20           |
|                                                     | <b>F</b> | 0.36**<br>(0.14,0.57)  | 0.96***<br>(0.76,1.17) | 1.53***<br>(1.32,1.74) | -0.06<br>(-0.27,0.14)  | 0.02<br>(-0.19,0.23)   | 1701 | 0.153          |
| <b>Guatemala</b>                                    | <b>M</b> | 0.08<br>(-0.43,0.58)   | 0.50<br>(-0.04,1.04)   | 0.39<br>(-0.15,0.92)   | 0.28<br>(-0.24,0.79)   | 0.40<br>(-0.22,1.03)   | 157  | 0.049          |
|                                                     | <b>F</b> | 1.01*<br>(0.22,1.81)   | 0.83*<br>(0.04,1.62)   | 0.29<br>(-0.43,1.01)   | 0.46<br>(-0.29,1.22)   | -0.14<br>(-0.90,0.62)  | 141  | 0.096          |
| <b>India</b>                                        | <b>M</b> | 0.43**<br>(0.15,0.72)  | 1.19***<br>(0.90,1.47) | 0.88***<br>(0.60,1.17) | 0.73***<br>(0.44,1.02) | 0.17<br>(-0.10,0.44)   | 775  | 0.165          |
|                                                     | <b>F</b> | 1.09***<br>(0.66,1.51) | 1.03***<br>(0.63,1.44) | 0.71***<br>(0.31,1.10) | 0.93***<br>(0.52,1.34) | 0.16<br>(-0.23,0.55)   | 551  | 0.135          |
| <b>Philippines</b>                                  | <b>M</b> | 0.29***<br>(0.13,0.46) | 0.77***<br>(0.61,0.93) | 1.34***<br>(1.18,1.50) | 0.73***<br>(0.57,0.89) | 0.36***<br>(0.20,0.52) | 1004 | 0.319          |
|                                                     | <b>F</b> | 0.48***<br>(0.30,0.66) | 0.58***<br>(0.40,0.75) | 1.57***<br>(1.40,1.75) | 0.16<br>(-0.01,0.33)   | 0.45***<br>(0.29,0.62) | 883  | 0.316          |
| <b>South Africa</b>                                 | <b>M</b> | 0.46**<br>(0.18,0.75)  | 0.95***<br>(0.66,1.24) | 1.07***<br>(0.80,1.35) | 0.20<br>(-0.10,0.50)   | 0.06*<br>(-0.21,0.34)  | 573  | 0.182          |
|                                                     | <b>F</b> | 0.71***<br>(0.40,1.03) | 1.82***<br>(1.50,2.14) | 1.26***<br>(0.95,1.56) | 0.2<br>(-0.11,0.51)    | -0.03<br>(-0.34,0.27)  | 630  | 0.243          |
| <b>All sites</b>                                    | <b>M</b> | 0.43***<br>(0.32,0.54) | 0.91***<br>(0.81,1.02) | 1.23***<br>(1.12,1.33) | 0.53***<br>(0.42,0.63) | 0.25***<br>(0.15,0.36) | 4391 | 0.31           |
| <b>Wald p<sup>1</sup></b>                           |          | 0.35                   | 0.084                  | 0.0001                 | 0.019                  | 0.43                   |      |                |
| <b>All sites</b>                                    | <b>F</b> | 0.55***<br>(0.42,0.68) | 1.02***<br>(0.89,1.15) | 1.31***<br>(1.18,1.44) | 0.19**<br>(0.06,0.31)  | 0.12*<br>(-0.01,0.24)  | 3906 | 0.259          |
| <b>Wald p<sup>1</sup></b>                           |          | 0.005                  | <0.0001                | <0.0001                | 0.0001                 | 0.063                  |      |                |
| <b>All sites, M+F</b>                               |          | 0.49***<br>(0.40,0.57) | 0.96***<br>(0.88,1.04) | 1.27***<br>(1.18,1.35) | 0.36***<br>(0.28,0.45) | 0.19***<br>(0.11,0.27) | 8297 | 0.281          |
| <b>Wald p<sup>2</sup></b>                           |          | 0.005                  | <0.0001                | <0.0001                | <0.0001                | 0.059                  |      |                |
| <b>Standard deviation of site-sex heterogeneity</b> |          | 0.10                   | 0.30                   | 0.34                   | 0.22                   | 0.12                   |      |                |

\*p < 0.05, \*\* p < 0.01, \*\*\* p < 0.001. <sup>1</sup>p-value for Wald test of site heterogeneity within sex. <sup>2</sup>p-value for Wald test of site-sex heterogeneity.

**Table 3. Association of birth weight (BW), conditional relative weight (CWh), and conditional height (CH) at age 2 y and mid-childhood (MC) with adult overweight or obesity (BMI>25 kg/m<sup>2</sup>). Odds ratios and 95% confidence intervals from logistic regression models stratified by site and sex, stratified by sex and adjusted for site, and pooled with adjustment for site and sex.**

|                                                     |          | BW                                  | CWh-2y                             | CWh-MC                             | CH-2y                              | CH-MC                              | N    |
|-----------------------------------------------------|----------|-------------------------------------|------------------------------------|------------------------------------|------------------------------------|------------------------------------|------|
| <b>Brazil</b>                                       | <b>M</b> | 1.30 <sup>***</sup><br>(1.16,1.45)  | 1.38 <sup>***</sup><br>(1.24,1.54) | 1.83 <sup>***</sup><br>(1.64,2.05) | 1.25 <sup>***</sup><br>(1.12,1.39) | 1.20 <sup>***</sup><br>(1.08,1.33) | 1882 |
|                                                     | <b>F</b> | 1.18 <sup>**</sup><br>(1.05,1.33)   | 1.52 <sup>***</sup><br>(1.35,1.70) | 1.86 <sup>***</sup><br>(1.65,2.11) | 0.98<br>(0.87,1.10)                | 1.08<br>(0.96,1.21)                | 1701 |
| <b>Guatemala</b>                                    | <b>M</b> | 1.08<br>(0.77,1.52)                 | 1.65 <sup>**</sup><br>(1.13,2.39)  | 1.02<br>(0.71,1.47)                | 1.22<br>(0.85,1.73)                | 1.49<br>(0.97,2.31)                | 157  |
|                                                     | <b>F</b> | 1.38<br>(0.94,2.01)                 | 1.18<br>(0.81,1.72)                | 1.14<br>(0.81,1.61)                | 1.08<br>(0.75,1.54)                | 0.8<br>(0.56,1.15)                 | 141  |
| <b>India</b>                                        | <b>M</b> | 1.19 <sup>*</sup><br>(1.02,1.39)    | 1.66 <sup>***</sup><br>(1.42,1.96) | 1.43 <sup>***</sup><br>(1.22,1.67) | 1.29 <sup>**</sup><br>(1.10,1.52)  | 1.03<br>(0.89,1.20)                | 775  |
|                                                     | <b>F</b> | 1.52 <sup>***</sup><br>(1.24,1.86)  | 1.42 <sup>***</sup><br>(1.18,1.72) | 1.27 <sup>**</sup><br>(1.06,1.53)  | 1.57 <sup>***</sup><br>(1.29,1.90) | 1.09<br>(0.91,1.31)                | 551  |
| <b>Philippines</b>                                  | <b>M</b> | 1.36 <sup>*</sup><br>(1.06,1.74)    | 1.88 <sup>***</sup><br>(1.48,2.40) | 3.07 <sup>***</sup><br>(2.36,4.00) | 2.09 <sup>***</sup><br>(1.62,2.69) | 1.60 <sup>***</sup><br>(1.26,2.03) | 1004 |
|                                                     | <b>F</b> | 1.65 <sup>***</sup><br>(1.24,2.21)  | 1.27<br>(0.97,1.66)                | 3.70 <sup>***</sup><br>(2.70,5.06) | 1.33 <sup>*</sup><br>(1.02,1.75)   | 1.52 <sup>**</sup><br>(1.15,1.99)  | 883  |
| <b>South Africa</b>                                 | <b>M</b> | 1.82 <sup>***</sup><br>(1.32, 2.50) | 1.78 <sup>***</sup><br>(1.29,2.45) | 2.32 <sup>***</sup><br>(1.66,3.25) | 1.54 <sup>**</sup><br>(1.14,2.09)  | 1.17<br>(0.86,1.58)                | 573  |
|                                                     | <b>F</b> | 1.21<br>(0.99,1.48)                 | 2.01 <sup>**</sup><br>(1.63,2.49)  | 1.73 <sup>***</sup><br>(1.42,2.12) | 1.11<br>(0.92,1.35)                | 0.84<br>(0.69,1.02)                | 630  |
| <b>All sites</b>                                    | <b>M</b> | 1.28 <sup>***</sup><br>(1.19,1.39)  | 1.53 <sup>***</sup><br>(1.41,1.66) | 1.78 <sup>***</sup><br>(1.64,1.92) | 1.34 <sup>***</sup><br>(1.24,1.45) | 1.20 <sup>***</sup><br>(1.11,1.29) | 4391 |
| <b>Wald p<sup>1</sup></b>                           |          | 0.16                                | 0.085                              | <0.0001                            | 0.005                              | 0.032                              |      |
| <b>All sites</b>                                    | <b>F</b> | 1.27 <sup>***</sup><br>(1.17,1.38)  | 1.51 <sup>***</sup><br>(1.39,1.63) | 1.74 <sup>***</sup><br>(1.60,1.90) | 1.13 <sup>**</sup><br>(1.04,1.22)  | 1.04<br>(0.96,1.13)                | 3906 |
| <b>Wald p<sup>1</sup></b>                           |          | 0.094                               | 0.03                               | <0.0001                            | 0.001                              | 0.006                              |      |
| <b>All sites, M+F</b>                               |          | 1.28 <sup>***</sup><br>(1.21,1.35)  | 1.51 <sup>***</sup><br>(1.43,1.60) | 1.76 <sup>***</sup><br>(1.66,1.86) | 1.24 <sup>***</sup><br>(1.17,1.31) | 1.12 <sup>***</sup><br>(1.06,1.18) | 8297 |
| <b>Wald p<sup>2</sup></b>                           |          | 0.10                                | 0.026                              | <0.0001                            | <0.0001                            | 0.0005                             |      |
| <b>Standard deviation of site-sex heterogeneity</b> |          | 0.00                                | 0.13                               | 0.60                               | 0.16                               | 0.11                               |      |

\* p < 0.05, \*\* p < 0.01, \*\*\* p < 0.001. <sup>1</sup>p-value for Wald test of site heterogeneity within sex. <sup>2</sup>p-value for Wald test of site-sex heterogeneity.

**Table 4. Association of birth weight (BW), conditional relative weight (CWh), and conditional height (CH) at age 2 y and mid-childhood (MC) with adult fat mass (SD score).  $\beta$ -coefficients and 95% confidence intervals from linear regression models stratified by site and sex, stratified by sex and adjusted for site, and pooled with adjustment for site and sex. No data available for Brazil females.**

|                                                     |          | BW                      | CWh-2y                  | CWh-MC                  | CH-2y                   | CH-MC                   | N    | R <sup>2</sup> |
|-----------------------------------------------------|----------|-------------------------|-------------------------|-------------------------|-------------------------|-------------------------|------|----------------|
| <b>Brazil</b>                                       | <b>M</b> | 0.19***<br>(0.15, 0.23) | 0.21***<br>(0.17, 0.25) | 0.32***<br>(0.28, 0.36) | 0.31***<br>(0.26, 0.35) | 0.16***<br>(0.12, 0.20) | 1688 | 0.290          |
| <b>Guatemala</b>                                    | <b>M</b> | 0.04<br>(-0.11, 0.20)   | 0.10<br>(-0.06, 0.27)   | 0.14<br>(-0.02, 0.30)   | 0.15<br>(-0.01, 0.30)   | 0.23*<br>(0.04, 0.42)   | 153  | 0.090          |
|                                                     | <b>F</b> | 0.26**<br>(0.10, 0.43)  | 0.16*<br>(0.00, 0.33)   | 0.05<br>(-0.10, 0.20)   | 0.25**<br>(0.09, 0.41)  | 0.02<br>(-0.14, 0.18)   | 140  | 0.164          |
| <b>India</b>                                        | <b>M</b> | 0.13***<br>(0.07, 0.19) | 0.23***<br>(0.17, 0.29) | 0.19***<br>(0.12, 0.25) | 0.28***<br>(0.21, 0.34) | 0.09**<br>(0.03, 0.15)  | 773  | 0.245          |
|                                                     | <b>F</b> | 0.26***<br>(0.18, 0.35) | 0.16***<br>(0.08, 0.24) | 0.14***<br>(0.06, 0.22) | 0.31***<br>(0.23, 0.39) | 0.09*<br>(0.01, 0.17)   | 546  | 0.212          |
| <b>Philippines</b>                                  | <b>M</b> | 0.09**<br>(0.03, 0.14)  | 0.17***<br>(0.11, 0.23) | 0.30***<br>(0.25, 0.36) | 0.35***<br>(0.29, 0.40) | 0.22***<br>(0.17, 0.28) | 922  | 0.280          |
|                                                     | <b>F</b> | 0.18***<br>(0.12, 0.24) | 0.18***<br>(0.13, 0.24) | 0.43***<br>(0.37, 0.49) | 0.24***<br>(0.19, 0.30) | 0.23***<br>(0.18, 0.29) | 761  | 0.355          |
| <b>South Africa</b>                                 | <b>M</b> | 0.22***<br>(0.14, 0.30) | 0.22***<br>(0.15, 0.30) | 0.25***<br>(0.18, 0.33) | 0.20***<br>(0.12, 0.27) | 0.08*<br>(0.01, 0.16)   | 539  | 0.197          |
|                                                     | <b>F</b> | 0.14***<br>(0.07, 0.21) | 0.39***<br>(0.31, 0.46) | 0.22***<br>(0.15, 0.29) | 0.12***<br>(0.05, 0.19) | 0.10**<br>(0.03, 0.17)  | 602  | 0.224          |
| <b>All sites</b>                                    | <b>M</b> | 0.16***<br>(0.13, 0.18) | 0.20***<br>(0.17, 0.23) | 0.27***<br>(0.25, 0.30) | 0.29***<br>(0.26, 0.32) | 0.15***<br>(0.12, 0.18) | 4075 | 0.248          |
| <b>Wald p<sup>1</sup></b>                           |          | 0.014                   | 0.42                    | 0.004                   | 0.015                   | 0.019                   |      |                |
| <b>All sites</b>                                    | <b>F</b> | 0.19***<br>(0.15, 0.23) | 0.24***<br>(0.20, 0.28) | 0.26***<br>(0.22, 0.30) | 0.23***<br>(0.19, 0.27) | 0.14***<br>(0.10, 0.18) | 2049 | 0.226          |
| <b>Wald p<sup>1</sup></b>                           |          | 0.13                    | 0.001                   | <0.001                  | 0.021                   | 0.007                   |      |                |
| <b>All sites, M+F</b>                               |          | 0.17***<br>(0.15, 0.19) | 0.21***<br>(0.19, 0.24) | 0.27***<br>(0.25, 0.30) | 0.27***<br>(0.25, 0.29) | 0.15***<br>(0.12, 0.17) | 6124 | 0.239          |
| <b>Wald p<sup>2</sup></b>                           |          | 0.008                   | 0.005                   | <0.001                  | 0.001                   | 0.002                   |      |                |
| <b>Standard deviation of site-sex heterogeneity</b> |          | 0.04                    | 0.05                    | 0.09                    | 0.05                    | 0.05                    |      |                |

\*p < 0.05, \*\* p < 0.01, \*\*\* p < 0.001. <sup>1</sup>p-value for Wald test of site heterogeneity within sex. <sup>2</sup>p-value for Wald test of site-sex heterogeneity.



**Table 5. Association of birth weight (BW), conditional relative weight (CWh), and conditional height (CH) at age 2 y and mid-childhood (MC) with adult fat-free mass (SD score).  $\beta$ -coefficients and 95% confidence intervals from linear regression models stratified by site and sex, stratified by sex and adjusted for site, and pooled with adjustment for site and sex. No data available for Brazil females.**

|                                                     |          | BW                      | CWh-2y                    | CWh-MC                  | CH-2y                   | CH-MC                   | N    | R <sup>2</sup> |
|-----------------------------------------------------|----------|-------------------------|---------------------------|-------------------------|-------------------------|-------------------------|------|----------------|
| <b>Brazil</b>                                       | <b>M</b> | 0.28***<br>(0.24, 0.32) | 0.20***<br>(0.16, 0.24)   | 0.26***<br>(0.22, 0.30) | 0.36***<br>(0.32, 0.40) | 0.20***<br>(0.16, 0.24) | 1688 | 0.337          |
| <b>Guatemala</b>                                    | <b>M</b> | 0.34***<br>(0.21, 0.47) | 0.09<br>(-0.04, 0.23)     | 0.12<br>(-0.02, 0.26)   | 0.42***<br>(0.29, 0.55) | 0.27***<br>(0.12, 0.43) | 153  | 0.354          |
|                                                     | <b>F</b> | 0.35***<br>(0.20, 0.50) | 0.16*<br>(0.02, 0.31)     | 0.04<br>(-0.09, 0.17)   | 0.43***<br>(0.29, 0.57) | 0.07<br>(-0.07, 0.21)   | 140  | 0.343          |
| <b>India</b>                                        | <b>M</b> | 0.23***<br>(0.17, 0.29) | 0.26***<br>(0.20, 0.32)   | 0.17***<br>(0.11, 0.23) | 0.41***<br>(0.35, 0.47) | 0.16***<br>(0.10, 0.22) | 773  | 0.306          |
|                                                     | <b>F</b> | 0.32***<br>(0.25, 0.40) | 0.23***<br>(0.16 to 0.30) | 0.11**<br>(0.04, 0.18)  | 0.47***<br>(0.39, 0.54) | 0.13***<br>(0.06, 0.20) | 546  | 0.352          |
| <b>Philippines</b>                                  | <b>M</b> | 0.23***<br>(0.18, 0.28) | 0.24***<br>(0.20, 0.29)   | 0.32***<br>(0.27, 0.37) | 0.48***<br>(0.44, 0.53) | 0.31***<br>(0.27, 0.36) | 922  | 0.513          |
|                                                     | <b>F</b> | 0.30***<br>(0.24, 0.35) | 0.19***<br>(0.14, 0.24)   | 0.39***<br>(0.33, 0.44) | 0.32***<br>(0.27, 0.38) | 0.32***<br>(0.27, 0.37) | 761  | 0.472          |
| <b>South Africa</b>                                 | <b>M</b> | 0.29***<br>(0.22, 0.36) | 0.22***<br>(0.15, 0.29)   | 0.16***<br>(0.09, 0.22) | 0.37***<br>(0.30, 0.44) | 0.26***<br>(0.20, 0.33) | 539  | 0.365          |
|                                                     | <b>F</b> | 0.26***<br>(0.19, 0.32) | 0.31***<br>(0.24, 0.37)   | 0.20***<br>(0.14, 0.26) | 0.36***<br>(0.30, 0.43) | 0.21***<br>(0.15, 0.27) | 602  | 0.366          |
| <b>All sites</b>                                    | <b>M</b> | 0.26***<br>(0.24, 0.29) | 0.22***<br>(0.20, 0.25)   | 0.24***<br>(0.21, 0.26) | 0.40***<br>(0.38, 0.43) | 0.23***<br>(0.20, 0.25) | 4075 | 0.364          |
| <b>Wald p<sup>1</sup></b>                           |          | 0.24                    | 0.16                      | <0.001                  | 0.076                   | 0.004                   |      |                |
| <b>All sites</b>                                    | <b>F</b> | 0.29***<br>(0.26, 0.33) | 0.23***<br>(0.20, 0.27)   | 0.23***<br>(0.19, 0.26) | 0.38***<br>(0.35, 0.42) | 0.22***<br>(0.19, 0.25) | 2049 | 0.370          |
| <b>Wald p<sup>1</sup></b>                           |          | 0.5                     | 0.15                      | <0.001                  | 0.16                    | <0.001                  |      |                |
| <b>All sites, M+F</b>                               |          | 0.27***<br>(0.25, 0.29) | 0.22***<br>(0.20, 0.25)   | 0.24***<br>(0.21, 0.26) | 0.40***<br>(0.37, 0.42) | 0.22***<br>(0.20, 0.24) | 6124 | 0.366          |
| <b>Wald p<sup>2</sup></b>                           |          | 0.26                    | 0.14                      | <0.001                  | 0.086                   | <0.001                  |      |                |
| <b>Standard deviation of site-sex heterogeneity</b> |          | 0.00                    | 0.02                      | 0.09                    | 0.04                    | 0.06                    |      |                |

\*p < 0.05, \*\* p < 0.01, \*\*\* p < 0.001. <sup>1</sup>p-value for Wald test of site heterogeneity within sex. <sup>2</sup>p-value for Wald test of site-sex heterogeneity

**Table 6. Association of birth weight (BW), conditional relative weight (CWh), and conditional height (CH) at age 2 y and mid-childhood (MC) with percentage body fat (SD score).  $\beta$ -coefficients and 95% confidence intervals from linear regression models stratified by site and sex, stratified by sex and adjusted for site, and pooled with adjustment for site and sex. No data available for Brazil females.**

|                                                     |          | BW                      | CWh-2y                  | CWh-MC                  | CH-2y                   | CH-MC                   | N    | R <sup>2</sup> |
|-----------------------------------------------------|----------|-------------------------|-------------------------|-------------------------|-------------------------|-------------------------|------|----------------|
| <b>Brazil</b>                                       | <b>M</b> | 0.11***<br>(0.07, 0.16) | 0.18***<br>(0.14, 0.23) | 0.30***<br>(0.26, 0.35) | 0.23***<br>(0.18, 0.27) | 0.11***<br>(0.07, 0.16) | 1688 | 0.193          |
| <b>Guatemala</b>                                    | <b>M</b> | -0.03<br>(-0.19, 0.13)  | 0.08<br>(-0.08, 0.25)   | 0.13<br>(-0.04, 0.29)   | 0.07<br>(-0.09, 0.23)   | 0.20*<br>(0.00, 0.39)   | 153  | 0.060          |
|                                                     | <b>F</b> | 0.22**<br>(0.05, 0.39)  | 0.15<br>(-0.02, 0.31)   | 0.05<br>(-0.10, 0.21)   | 0.19*<br>(0.03, 0.35)   | -0.01<br>(-0.17, 0.15)  | 140  | 0.117          |
| <b>India</b>                                        | <b>M</b> | 0.06<br>(-0.01, 0.12)   | 0.17***<br>(0.11, 0.24) | 0.16***<br>(0.10, 0.23) | 0.17***<br>(0.10, 0.24) | 0.03<br>(-0.03, 0.10)   | 773  | 0.192          |
|                                                     | <b>F</b> | 0.19***<br>(0.10, 0.27) | 0.10*<br>(0.01, 0.18)   | 0.12**<br>(0.04, 0.21)  | 0.18***<br>(0.10, 0.27) | 0.06<br>(-0.02, 0.14)   | 546  | 0.107          |
| <b>Philippines</b>                                  | <b>M</b> | 0.02<br>(-0.04, 0.09)   | 0.12***<br>(0.06, 0.18) | 0.25***<br>(0.19, 0.31) | 0.25***<br>(0.19, 0.31) | 0.16***<br>(0.10, 0.22) | 922  | 0.156          |
|                                                     | <b>F</b> | 0.07*<br>(0.00, 0.14)   | 0.12***<br>(0.05, 0.19) | 0.34***<br>(0.28, 0.41) | 0.13***<br>(0.06, 0.20) | 0.12***<br>(0.05, 0.18) | 761  | 0.162          |
| <b>South Africa</b>                                 | <b>M</b> | 0.14***<br>(0.06, 0.22) | 0.17***<br>(0.09, 0.25) | 0.22***<br>(0.14, 0.29) | 0.08<br>(-0.0, 0.17)    | -0.00<br>(-0.08, 0.08)  | 539  | 0.097          |
|                                                     | <b>F</b> | 0.05<br>(-0.02, 0.13)   | 0.32***<br>(0.24, 0.40) | 0.18***<br>(0.11, 0.25) | -0.02<br>(-0.10, 0.05)  | 0.02<br>(-0.06, 0.09)   | 602  | 0.128          |
| <b>All sites</b>                                    | <b>M</b> | 0.08***<br>(0.05, 0.11) | 0.16***<br>(0.13, 0.19) | 0.24***<br>(0.22, 0.27) | 0.20***<br>(0.17, 0.23) | 0.09***<br>(0.06, 0.12) | 4075 | 0.154          |
| <b>Wald p<sup>1</sup></b>                           |          | 0.037                   | 0.46                    | 0.006                   | 0.006                   | 0.01                    |      |                |
| <b>All sites</b>                                    | <b>F</b> | 0.10***<br>(0.06, 0.14) | 0.17***<br>(0.13, 0.22) | 0.21***<br>(0.17, 0.26) | 0.10***<br>(0.06, 0.15) | 0.06***<br>(0.02, 0.10) | 2049 | 0.104          |
| <b>Wald p<sup>1</sup></b>                           |          | 0.042                   | 0.002                   | <0.001                  | 0.004                   | 0.23                    |      |                |
| <b>All sites, M+F</b>                               |          | 0.09***<br>(0.06, 0.11) | 0.16***<br>(0.14, 0.19) | 0.23***<br>(0.21, 0.26) | 0.17***<br>(0.14, 0.19) | 0.08***<br>(0.06, 0.11) | 6124 | 0.135          |
| <b>Wald p<sup>2</sup></b>                           |          | 0.014                   | 0.014                   | <0.001                  | <0.001                  | 0.016                   |      |                |
| <b>Standard deviation of site-sex heterogeneity</b> |          | 0.04                    | 0.05                    | 0.07                    | 0.06                    | 0.04                    |      |                |

\*p < 0.05, \*\* p < 0.01, \*\*\* p < 0.001. <sup>1</sup>p-value for Wald test of site heterogeneity within sex. <sup>2</sup>p-value for Wald test of site-sex heterogeneity.

**Table 7. Association of birth weight (BW), conditional relative weight (CWh), and conditional height (CH) at age 2 y and mid-childhood (MC) with adult waist circumference (cm).  $\beta$ -coefficients and 95% confidence intervals from linear regression models stratified by site and sex, stratified by sex and adjusted for site, and pooled with adjustment for site and sex. No data available for South Africa.**

|                                                     |          | BW                      | CWh-2y                  | CWh-MC                  | CH-2y                   | CH-MC                   | N    | R <sup>2</sup> |
|-----------------------------------------------------|----------|-------------------------|-------------------------|-------------------------|-------------------------|-------------------------|------|----------------|
| <b>Brazil</b>                                       | <b>M</b> | 1.63***<br>(1.20, 2.07) | 1.79***<br>(1.36, 2.21) | 2.90***<br>(2.48, 3.32) | 2.23***<br>(1.82, 2.65) | 1.41***<br>(0.99, 1.83) | 1880 | 0.197          |
|                                                     | <b>F</b> | 0.82**<br>(0.33, 1.32)  | 1.63***<br>(1.16, 2.10) | 2.92***<br>(2.44, 3.40) | 0.62*<br>(0.14, 1.10)   | 0.49*<br>(0.00, 0.97)   | 1700 | 0.110          |
| <b>Guatemala</b>                                    | <b>M</b> | 0.37<br>(-0.93, 1.67)   | 0.83<br>(-0.54, 2.21)   | 0.99<br>(-0.36, 2.34)   | 1.28<br>(-0.03, 2.59)   | 1.82*<br>(0.23, 3.40)   | 153  | 0.085          |
|                                                     | <b>F</b> | 2.25*<br>(0.32, 4.19)   | 1.09<br>(-0.82, 3.00)   | 0.70<br>(-1.05, 2.44)   | 2.10*<br>(0.27, 3.94)   | 0.25<br>(-1.58, 2.09)   | 140  | 0.102          |
| <b>India</b>                                        | <b>M</b> | 1.50***<br>(0.71, 2.28) | 2.92***<br>(2.13, 3.71) | 1.97***<br>(1.19, 2.75) | 3.16***<br>(2.35, 3.96) | 1.07**<br>(0.33, 1.82)  | 775  | 0.199          |
|                                                     | <b>F</b> | 2.66***<br>(1.61, 3.72) | 2.05***<br>(1.05, 3.05) | 0.99*<br>(0.01, 1.97)   | 2.80***<br>(1.79, 3.80) | 1.79***<br>(0.82, 2.75) | 551  | 0.137          |
| <b>Philippines</b>                                  | <b>M</b> | 0.72***<br>(0.32, 1.11) | 1.30***<br>(0.91, 1.69) | 2.65***<br>(2.26, 3.04) | 2.69***<br>(2.29, 3.09) | 1.65***<br>(1.26, 2.04) | 1002 | 0.323          |
|                                                     | <b>F</b> | 1.20***<br>(0.78, 1.62) | 0.99***<br>(0.57, 1.40) | 3.24***<br>(2.82, 3.65) | 1.13***<br>(0.72, 1.54) | 1.55***<br>(1.15, 1.96) | 881  | 0.301          |
| <b>All sites</b>                                    | <b>M</b> | 1.30***<br>(1.01, 1.59) | 1.85***<br>(1.56, 2.14) | 2.57***<br>(2.29, 2.86) | 2.50***<br>(2.21, 2.79) | 1.40***<br>(1.11, 1.68) | 3810 | 0.433          |
| <b>Wald p<sup>1</sup></b>                           |          | 0.052                   | 0.002                   | 0.048                   | 0.058                   | 0.57                    |      |                |
| <b>All sites</b>                                    | <b>F</b> | 1.26***<br>(0.92, 1.61) | 1.53***<br>(1.20, 1.86) | 2.55***<br>(2.22, 2.89) | 1.17***<br>(0.83, 1.50) | 0.95***<br>(0.62, 1.28) | 3272 | 0.323          |
| <b>Wald p<sup>1</sup></b>                           |          | 0.011                   | 0.12                    | <0.001                  | 0.001                   | 0.011                   |      |                |
| <b>All sites, M+F</b>                               |          | 1.28***<br>(1.05, 1.50) | 1.69***<br>(1.48, 1.91) | 2.57***<br>(2.35, 2.78) | 1.87***<br>(1.66, 2.09) | 1.19***<br>(0.98, 1.41) | 7082 | 0.421          |
| <b>Wald p<sup>2</sup></b>                           |          | 0.008                   | 0.002                   | <0.001                  | <0.001                  | 0.016                   |      |                |
| <b>Standard deviation of site-sex heterogeneity</b> |          | 0.43                    | 0.41                    | 0.74                    | 0.54                    | 0.30                    |      |                |

p < 0.05, \*\* p < 0.01, \*\*\* p < 0.001. <sup>1</sup>p-value for Wald test of site heterogeneity within sex. <sup>2</sup>p-value for Wald test of site-sex heterogeneity.

**Table 8. Association of birth weight (BW), conditional relative weight (CWh), and conditional height (CH) at age 2 y, mid-childhood (MC), and adulthood, with adult systolic blood pressure (mmHg).  $\beta$ -coefficients and 95% confidence intervals from linear regression models stratified by site and sex, stratified by sex and adjusted for site, and pooled with adjustment for site and sex.**

|                                                     |          | BW                    | CWh-2y                 | CWh-MC                 | CWh-Adult              | CH-2y                  | CH-MC                  | CH-Adult                | N    | R <sup>2</sup> |
|-----------------------------------------------------|----------|-----------------------|------------------------|------------------------|------------------------|------------------------|------------------------|-------------------------|------|----------------|
| <b>Brazil</b>                                       | <b>M</b> | -0.42<br>(-1.07,0.23) | 0.40<br>(-0.24,1.03)   | 1.98***<br>(1.36,2.60) | 4.50***<br>(3.87,5.12) | 1.05**<br>(0.42,1.67)  | 0.97**<br>(0.35,1.60)  | 0.01<br>(-0.60,0.62)    | 1879 | 0.125          |
|                                                     | <b>F</b> | -0.4<br>(-1.02,0.22)  | 0.60*<br>(0.01,1.19)   | 0.87**<br>(0.26,1.47)  | 3.53***<br>(2.94,4.13) | 0.93**<br>(0.34,1.53)  | 0.50<br>(-0.10,1.10)   | 0.15<br>(-0.44,0.74)    | 1701 | 0.088          |
| <b>Guatemala</b>                                    | <b>M</b> | 0.95<br>(-0.60,2.49)  | -0.76<br>(-2.40,0.88)  | 0.16<br>(-1.52,1.85)   | 3.12***<br>(1.55,4.70) | 1.09<br>(-0.47,2.64)   | -1.06<br>(-3.00,0.87)  | 0.88<br>(-0.81,2.56)    | 147  | 0.139          |
|                                                     | <b>F</b> | 1.12<br>(-0.48,2.72)  | 0.67<br>(-0.92,2.26)   | 1.56*<br>(0.10,3.03)   | 5.27***<br>(3.72,6.82) | 3.89***<br>(2.37,5.41) | 0.41<br>(-1.11,1.93)   | -1.71*<br>(-3.30,-0.13) | 138  | 0.393          |
| <b>India</b>                                        | <b>M</b> | -0.13<br>(-0.91,0.65) | 0.72<br>(-0.07,1.50)   | 0.71<br>(-0.07,1.50)   | 4.03***<br>(3.26,4.80) | 1.62***<br>(0.82,2.42) | 0.3<br>(-0.44,1.05)    | 0.71<br>(-0.05,1.46)    | 769  | 0.149          |
|                                                     | <b>F</b> | 0.00<br>(-0.99,0.99)  | 0.06<br>(-0.88,1.00)   | 0.84<br>(-0.08,1.76)   | 3.02***<br>(2.09,3.95) | 0.00<br>(-0.95,0.95)   | -0.27<br>(-1.19,0.64)  | -0.14<br>(-1.05,0.77)   | 544  | 0.078          |
| <b>Philippines</b>                                  | <b>M</b> | -0.16<br>(-0.81,0.48) | 0.35<br>(-0.29,0.98)   | 1.05**<br>(0.41,1.68)  | 3.02***<br>(2.39,3.64) | 1.81***<br>(1.15,2.46) | 1.24***<br>(0.61,1.88) | -0.79*<br>(-1.42,-0.16) | 1004 | 0.142          |
|                                                     | <b>F</b> | 0.06<br>(-0.59,0.71)  | 0.29<br>(-0.35,0.94)   | 1.10***<br>(0.45,1.74) | 2.89***<br>(2.26,3.52) | 0.4<br>(-0.23,1.04)    | 0.96**<br>(0.34,1.58)  | -0.03<br>(-0.66,0.60)   | 882  | 0.107          |
| <b>South Africa</b>                                 | <b>M</b> | 0.05<br>(-0.79,0.90)  | 1.25**<br>(0.39,2.11)  | 0.99*<br>(0.18,1.80)   | 3.40***<br>(2.54,4.26) | 0.74<br>(-0.13,1.61)   | 0.64<br>(-0.17,1.45)   | 0.43<br>(-0.44,1.29)    | 554  | 0.129          |
|                                                     | <b>F</b> | 0.08<br>(-0.69,0.84)  | 0.84*<br>(0.08,1.60)   | 0.23<br>(-0.49,0.95)   | 2.66***<br>(1.92,3.40) | 0.99**<br>(0.24,1.73)  | -0.05<br>(-0.78,0.68)  | 0.88*<br>(0.14,1.62)    | 615  | 0.113          |
| <b>All sites</b>                                    | <b>M</b> | -0.2<br>(-0.56,0.16)  | 0.51**<br>(0.15,0.87)  | 1.38***<br>(1.02,1.74) | 3.86***<br>(3.50,4.21) | 1.29***<br>(0.92,1.65) | 0.82***<br>(0.46,1.17) | 0.02<br>(-0.33,0.38)    | 4353 | 0.224          |
| <b>Wald p<sup>1</sup></b>                           |          | 0.68                  | 0.38                   | 0.045                  | 0.016                  | 0.38                   | 0.22                   | 0.072                   |      |                |
| <b>All sites</b>                                    | <b>F</b> | -0.09<br>(-0.45,0.28) | 0.49**<br>(0.13,0.84)  | 0.83***<br>(0.48,1.18) | 3.24***<br>(2.89,3.59) | 0.81***<br>(0.46,1.16) | 0.41*<br>(0.06,0.76)   | 0.13<br>(-0.22,0.47)    | 3880 | 0.249          |
| <b>Wald p<sup>1</sup></b>                           |          | 0.55                  | 0.77                   | 0.55                   | 0.077                  | 0.005                  | 0.25                   | 0.15                    |      |                |
| <b>All sites, M+F</b>                               |          | -0.15<br>(-0.41,0.11) | 0.50***<br>(0.25,0.75) | 1.12***<br>(0.87,1.37) | 3.56***<br>(3.32,3.81) | 1.06***<br>(0.80,1.31) | 0.62***<br>(0.37,0.87) | 0.07<br>(-0.18,0.32)    | 8233 | 0.348          |
| <b>Wald p<sup>2</sup></b>                           |          | 0.80                  | 0.72                   | 0.042                  | 0.001                  | 0.01                   | 0.13                   | 0.074                   |      |                |
| <b>Standard deviation of site-sex heterogeneity</b> |          | 0.00                  | 0.00                   | 0.25                   | 0.44                   | 0.51                   | 0.22                   | 0.40                    |      |                |

\* p < 0.05, \*\* p < 0.01, \*\*\* p < 0.001. <sup>1</sup>p-value for Wald test of site heterogeneity within sex. <sup>2</sup>p-value for Wald test of site-sex heterogeneity.

**Table 9. Association of birth weight (BW), conditional relative weight (CWh), and conditional height (CH) at age 2 y, mid-childhood (MC), and adulthood, with adult diastolic blood pressure (mmHg).  $\beta$ -coefficients and 95% confidence intervals from linear regression models stratified by site and sex, stratified by sex and adjusted for site, and pooled with adjustment for site and sex.**

|                                                     |          | BW                      | CWh-2y                | CWh-MC                 | CWh-Adult              | CH-2y                  | CH-MC                 | CH-Adult                 | N    | R <sup>2</sup> |
|-----------------------------------------------------|----------|-------------------------|-----------------------|------------------------|------------------------|------------------------|-----------------------|--------------------------|------|----------------|
| <b>Brazil</b>                                       | <b>M</b> | -0.61*<br>(-1.14,-0.08) | 0.19<br>(-0.33,0.72)  | 1.30***<br>(0.79,1.81) | 3.30***<br>(2.79,3.81) | 0.31<br>(-0.20,0.83)   | 0.40<br>(-0.11,0.91)  | -0.31<br>(-0.82,0.19)    | 1879 | 0.098          |
|                                                     | <b>F</b> | -0.1<br>(-0.62,0.42)    | 0.31<br>(-0.19,0.81)  | 0.75**<br>(0.24,1.26)  | 2.19***<br>(1.69,2.69) | 0.69**<br>(0.19,1.19)  | 0.52*<br>(0.02,1.03)  | -0.16<br>(-0.65,0.34)    | 1701 | 0.054          |
| <b>Guatemala</b>                                    | <b>M</b> | 1.24<br>(-0.20,2.67)    | 0.29<br>(-1.23,1.82)  | -0.56<br>(-2.13,1.00)  | 2.52***<br>(1.05,3.98) | 0.21<br>(-1.24,1.65)   | -1.34<br>(-3.14,0.46) | 0.67<br>(-0.90,2.24)     | 147  | 0.122          |
|                                                     | <b>F</b> | -0.06<br>(-1.48,1.36)   | -0.42<br>(-1.83,0.99) | 1.22<br>(-0.08,2.52)   | 2.99***<br>(1.61,4.37) | 2.40***<br>(1.05,3.75) | -0.16<br>(-1.51,1.18) | -1.21<br>(-2.61,0.20)    | 138  | 0.234          |
| <b>India</b>                                        | <b>M</b> | -0.15<br>(-0.85,0.55)   | 0.65<br>(-0.05,1.35)  | 0.53<br>(-0.17,1.22)   | 3.87***<br>(3.19,4.56) | 1.63***<br>(0.91,2.35) | 0.23<br>(-0.43,0.90)  | 0.14<br>(-0.54,0.82)     | 769  | 0.169          |
|                                                     | <b>F</b> | -0.26<br>(-1.04,0.52)   | 0.6<br>(-0.14,1.33)   | 0.54<br>(-0.18,1.27)   | 3.77***<br>(3.04,4.50) | 0.35<br>(-0.40,1.09)   | -0.27<br>(-0.99,0.45) | -0.76*<br>(-1.47,-0.04)  | 544  | 0.178          |
| <b>Philippines</b>                                  | <b>M</b> | -0.1<br>(-0.68,0.48)    | 0.63*<br>(0.05,1.20)  | 0.91*<br>(0.33,1.48)   | 1.97***<br>(1.40,2.53) | 1.01**<br>(0.42,1.60)  | 0.57*<br>(0.01,1.14)  | -0.95**<br>(-1.52,-0.38) | 1004 | 0.11           |
|                                                     | <b>F</b> | 0.17<br>(-0.40,0.73)    | 0.33<br>(-0.23,0.89)  | 0.51<br>(-0.05,1.07)   | 2.34***<br>(1.79,2.88) | 0.2<br>(-0.35,0.75)    | 0.47<br>(-0.07,1.01)  | 0.29<br>(-0.25,0.84)     | 882  | 0.094          |
| <b>South Africa</b>                                 | <b>M</b> | -0.05<br>(-0.78,0.68)   | 0.43<br>(-0.31,1.17)  | 0.34<br>(-0.36,1.04)   | 1.15**<br>(0.41,1.89)  | -0.28<br>(-1.03,0.48)  | 0.67<br>(-0.03,1.37)  | 0.29<br>(-0.46,1.04)     | 554  | 0.03           |
|                                                     | <b>F</b> | 0.17<br>(-0.51,0.85)    | 0.38<br>(-0.30,1.06)  | -0.16<br>(-0.80,0.49)  | 1.41***<br>(0.75,2.07) | 0.79*<br>(0.12,1.46)   | -0.11<br>(-0.77,0.54) | 0.39<br>(-0.27,1.05)     | 615  | 0.056          |
| <b>All sites</b>                                    | <b>M</b> | -0.27<br>(-0.59,0.04)   | 0.41**<br>(0.10,0.72) | 0.93***<br>(0.63,1.24) | 2.77***<br>(2.46,3.07) | 0.61***<br>(0.30,0.92) | 0.40*<br>(0.09,0.70)  | -0.28<br>(-0.59,0.02)    | 4353 | 0.12           |
| <b>Wald p<sup>1</sup></b>                           |          | 0.20                    | 0.80                  | 0.079                  | <0.0001                | 0.007                  | 0.43                  | 0.073                    |      |                |
| <b>All sites</b>                                    | <b>F</b> | 0.01<br>(-0.29,0.32)    | 0.34*<br>(0.04,0.63)  | 0.54***<br>(0.24,0.83) | 2.34***<br>(2.04,2.63) | 0.62***<br>(0.32,0.92) | 0.28<br>(-0.02,0.57)  | -0.1<br>(-0.39,0.20)     | 3880 | 0.101          |
| <b>Wald p<sup>1</sup></b>                           |          | 0.91                    | 0.87                  | 0.26                   | 0.0007                 | 0.12                   | 0.32                  | 0.10                     |      |                |
| <b>All sites, M+F</b>                               |          | -0.14<br>(-0.36,0.08)   | 0.37**<br>(0.16,0.59) | 0.75***<br>(0.53,0.96) | 2.57***<br>(2.35,2.78) | 0.62***<br>(0.40,0.84) | 0.34**<br>(0.13,0.55) | -0.2<br>(-0.41,0.02)     | 8233 | 0.149          |
| <b>Wald p<sup>2</sup></b>                           |          | 0.48                    | 0.96                  | 0.058                  | <0.0001                | 0.009                  | 0.45                  | 0.047                    |      |                |
| <b>Standard deviation of site-sex heterogeneity</b> |          | 0.00                    | 0.00                  | 0.21                   | 0.82                   | 0.46                   | 0.00                  | 0.34                     |      |                |

\* p < 0.05, \*\* p < 0.01, \*\*\* p < 0.001. <sup>1</sup>p-value for Wald test of site heterogeneity within sex. <sup>2</sup>p-value for Wald test of site-sex heterogeneity.

**Table 10. Association of birth weight (BW), conditional relative weight (CWh), and conditional height (CH) at age 2 y, mid-childhood (MC), and adulthood, with adult elevated blood pressure. Odds ratios and 95% confidence intervals from logistic regression models stratified by site and sex, stratified by sex and adjusted for site, and pooled with adjustment for site and sex.**

|                                                     |          | BW                   | CWh-2y               | CWh-MC                 | CWh-Adult              | CH-2y                  | CH-MC                | CH-Adult             | N    |
|-----------------------------------------------------|----------|----------------------|----------------------|------------------------|------------------------|------------------------|----------------------|----------------------|------|
| <b>Brazil</b>                                       | <b>M</b> | 0.93<br>(0.84,1.03)  | 1.09<br>(0.98,1.20)  | 1.25***<br>(1.13,1.38) | 1.67***<br>(1.51,1.85) | 1.07<br>(0.97,1.18)    | 1.1<br>(1.00,1.22)   | 1<br>(0.90,1.10)     | 1879 |
|                                                     | <b>F</b> | 0.91<br>(0.78,1.06)  | 1.1<br>(0.95,1.27)   | 1.16*<br>(1.01,1.34)   | 1.61***<br>(1.40,1.86) | 1.02<br>(0.88,1.17)    | 1.19*<br>(1.03,1.37) | 0.94<br>(0.82,1.09)  | 1701 |
| <b>Guatemala</b>                                    | <b>M</b> | 0.99<br>(0.63,1.55)  | 0.77<br>(0.47,1.27)  | 1.13<br>(0.69,1.86)    | 1.71*<br>(1.09,2.67)   | 1.37<br>(0.86,2.19)    | 0.86<br>(0.50,1.48)  | 1.26<br>(0.77,2.06)  | 147  |
|                                                     | <b>F</b> | 0.74<br>(0.35,1.59)  | 0.57<br>(0.26,1.24)  | 1.66<br>(0.79,3.50)    | 2.50*<br>(1.17,5.34)   | 2.34*<br>(1.07,5.13)   | 0.64<br>(0.30,1.38)  | 0.89<br>(0.42,1.88)  | 138  |
| <b>India</b>                                        | <b>M</b> | 0.95<br>(0.80,1.14)  | 1.05<br>(0.88,1.25)  | 1.19<br>(0.99,1.41)    | 1.96***<br>(1.63,2.37) | 1.35**<br>(1.12,1.62)  | 1.07<br>(0.91,1.27)  | 1.04<br>(0.87,1.23)  | 769  |
|                                                     | <b>F</b> | 0.93<br>(0.71,1.24)  | 1.04<br>(0.80,1.36)  | 1.13<br>(0.86,1.49)    | 1.80***<br>(1.36,2.38) | 1.14<br>(0.86,1.50)    | 0.86<br>(0.66,1.11)  | 0.98<br>(0.75,1.27)  | 544  |
| <b>Philippines</b>                                  | <b>M</b> | 0.9<br>(0.76,1.08)   | 1.06<br>(0.89,1.25)  | 1.23*<br>(1.04,1.46)   | 1.60***<br>(1.35,1.89) | 1.36***<br>(1.14,1.62) | 1.01<br>(0.86,1.20)  | 0.81*<br>(0.68,0.96) | 1004 |
|                                                     | <b>F</b> | 0.78<br>(0.49,1.26)  | 1.45<br>(0.93,2.27)  | 1.56*<br>(1.01,2.43)   | 2.31***<br>(1.46,3.65) | 0.96<br>(0.59,1.56)    | 0.9<br>(0.58,1.42)   | 1.14<br>(0.72,1.83)  | 882  |
| <b>South Africa</b>                                 | <b>M</b> | 1.02<br>(0.82,1.26)  | 1.13<br>(0.92,1.40)  | 1.31**<br>(1.07,1.60)  | 1.91***<br>(1.52,2.40) | 1.08<br>(0.87,1.35)    | 1.17<br>(0.95,1.44)  | 1.19<br>(0.96,1.48)  | 554  |
|                                                     | <b>F</b> | 0.94<br>(0.71,1.23)  | 1.02<br>(0.77,1.35)  | 1.14<br>(0.88,1.49)    | 1.69***<br>(1.28,2.22) | 1.12<br>(0.85,1.49)    | 0.96<br>(0.73,1.27)  | 1.05<br>(0.80,1.37)  | 615  |
| <b>All sites</b>                                    | <b>M</b> | 0.94<br>(0.87,1.01)  | 1.07<br>(1.00,1.15)  | 1.25***<br>(1.16,1.34) | 1.72***<br>(1.60,1.85) | 1.17***<br>(1.08,1.25) | 1.08*<br>(1.01,1.16) | 0.99<br>(0.92,1.06)  | 4353 |
| <b>Wald p<sup>1</sup></b>                           |          | 0.93                 | 0.72                 | 0.95                   | 0.43                   | 0.051                  | 0.75                 | 0.053                |      |
| <b>All sites</b>                                    | <b>F</b> | 0.91<br>(0.81,1.02)  | 1.07<br>(0.96,1.20)  | 1.18**<br>(1.06,1.32)  | 1.70***<br>(1.52,1.90) | 1.07<br>(0.96,1.20)    | 1.05<br>(0.94,1.17)  | 0.98<br>(0.87,1.09)  | 3880 |
| <b>Wald p<sup>1</sup></b>                           |          | 0.95                 | 0.34                 | 0.64                   | 0.50                   | 0.31                   | 0.11                 | 0.92                 |      |
| <b>All sites, M+F</b>                               |          | 0.93*<br>(0.88,0.99) | 1.07*<br>(1.01,1.13) | 1.22***<br>(1.15,1.30) | 1.71***<br>(1.61,1.82) | 1.12***<br>(1.06,1.19) | 1.07*<br>(1.01,1.13) | 0.99<br>(0.93,1.05)  | 8233 |
| <b>Wald p<sup>2</sup></b>                           |          | 0.99                 | 0.68                 | 0.93                   | 0.61                   | 0.07                   | 0.39                 | 0.32                 |      |
| <b>Standard deviation of site-sex heterogeneity</b> |          | 0.00                 | 0.00                 | 0.00                   | 0.00                   | 0.06                   | 0.00                 | 0.05                 |      |

\* p < 0.05, \*\* p < 0.01, \*\*\* p < 0.001. <sup>1</sup>p-value for Wald test of site heterogeneity within sex. <sup>2</sup>p-value for Wald test of site-sex heterogeneity.

**Table 11. Association of birth weight (BW), conditional relative weight (CWh), and conditional height (CH) at age 2 yr and mid-childhood (MC) with adult log glucose (SD units).  $\beta$ -coefficients and 95% confidence intervals from linear regression models stratified by site and sex, stratified by sex and adjusted for site, and pooled with adjustment for site and sex.**

|                                                     |          | BW                        | CWh-2y                 | CWh-MC                 | CWh-Adult               | CH-2y                    | CH-MC                  | CH-Adult               | N    | R <sup>2</sup> |
|-----------------------------------------------------|----------|---------------------------|------------------------|------------------------|-------------------------|--------------------------|------------------------|------------------------|------|----------------|
| <b>Brazil</b>                                       | <b>M</b> | -0.02<br>(-0.07, 0.03)    | 0.00<br>(-0.05, 0.05)  | 0.00<br>(-0.05, 0.05)  | 0.14***<br>(0.09, 0.19) | -0.02<br>(-0.07, 0.03)   | 0.01<br>(-0.04, 0.06)  | 0.01<br>(-0.04, 0.06)  | 1586 | 0.020          |
|                                                     | <b>F</b> | -0.05*<br>(-0.11, -0.00)  | -0.00<br>(-0.05, 0.05) | 0.08**<br>(0.03, 0.13) | 0.13***<br>(0.08, 0.18) | -0.04<br>(-0.09, 0.02)   | -0.05<br>(-0.10, 0.00) | 0.01<br>(-0.04, 0.06)  | 1498 | 0.030          |
| <b>Guatemala</b>                                    | <b>M</b> | -0.25**<br>(-0.44, -0.07) | -0.00<br>(-0.21, 0.20) | -0.15<br>(-0.35, 0.05) | -0.05<br>(-0.25, 0.14)  | -0.24*<br>(-0.43, -0.05) | -0.04<br>(-0.27, 0.20) | -0.06<br>(-0.26, 0.13) | 106  | 0.143          |
|                                                     | <b>F</b> | 0.03<br>(-0.14, 0.21)     | -0.07<br>(-0.25, 0.12) | 0.01<br>(-0.17, 0.18)  | 0.33***<br>(0.15, 0.50) | 0.01<br>(-0.16, 0.18)    | 0.07<br>(-0.10, 0.24)  | 0.01<br>(-0.17, 0.20)  | 121  | 0.127          |
| <b>India</b>                                        | <b>M</b> | -0.04<br>(-0.12, 0.03)    | 0.05<br>(-0.03, 0.12)  | -0.01<br>(-0.08, 0.06) | 0.07<br>(-0.01, 0.14)   | 0.10**<br>(0.03, 0.18)   | -0.02<br>(-0.09, 0.05) | 0.03<br>(-0.05, 0.10)  | 761  | 0.037          |
|                                                     | <b>F</b> | -0.05<br>(-0.14, 0.04)    | -0.07<br>(-0.15, 0.02) | 0.00<br>(-0.08, 0.09)  | 0.12**<br>(0.04, 0.21)  | 0.08<br>(-0.01, 0.16)    | 0.03<br>(-0.05, 0.12)  | 0.06<br>(-0.02, 0.15)  | 538  | 0.038          |
| <b>Philippines</b>                                  | <b>M</b> | 0.01<br>(-0.06, 0.08)     | -0.01<br>(-0.08, 0.06) | -0.01<br>(-0.08, 0.06) | 0.04<br>(-0.02, 0.11)   | 0.06<br>(-0.01, 0.13)    | 0.04<br>(-0.03, 0.11)  | 0.04<br>(-0.02, 0.11)  | 869  | 0.023          |
|                                                     | <b>F</b> | -0.07<br>(-0.15, 0.01)    | 0.03<br>(-0.04, 0.11)  | 0.08<br>(0.00, 0.15)   | 0.08*<br>(0.01, 0.16)   | -0.04<br>(-0.11, 0.04)   | -0.02<br>(-0.10, 0.05) | -0.02<br>(-0.09, 0.06) | 709  | 0.023          |
| <b>South Africa</b>                                 | <b>M</b> | 0.02<br>(-0.08, 0.13)     | 0.02<br>(-0.18, 0.13)  | 0.04<br>(-0.06, 0.14)  | 0.10<br>(-0.02, 0.22)   | 0.04<br>(-0.07, 0.16)    | 0.07<br>(-0.04, 0.17)  | 0.00<br>(-0.11, 0.11)  | 354  | 0.017          |
|                                                     | <b>F</b> | 0.01<br>(-0.10, 0.11)     | -0.03<br>(-0.14, 0.08) | -0.00<br>(-0.10, 0.10) | 0.08<br>(-0.02, 0.18)   | 0.13*<br>(0.03, 0.24)    | 0.05<br>(-0.05, 0.16)  | 0.10<br>(-0.01, 0.20)  | 365  | 0.049          |
| <b>All sites</b>                                    | <b>M</b> | -0.02<br>(-0.05, 0.01)    | 0.01<br>(-0.02, 0.04)  | -0.00<br>(-0.03, 0.03) | 0.09***<br>(0.06, 0.13) | 0.02<br>(-0.01, 0.06)    | 0.01<br>(-0.02, 0.05)  | 0.02<br>(-0.01, 0.05)  | 3676 | 0.017          |
| <b>Wald p<sup>1</sup></b>                           |          | 0.12                      | 0.73                   | 0.64                   | 0.066                   | 0.005                    | 0.52                   | 0.84                   |      |                |
| <b>All sites</b>                                    | <b>F</b> | -0.05*<br>(-0.08, -0.01)  | -0.01<br>(-0.04, 0.03) | 0.05**<br>(0.02, 0.09) | 0.12***<br>(0.08, 0.15) | 0.00<br>(-0.03, 0.04)    | -0.01<br>(-0.05, 0.02) | 0.02<br>(-0.01, 0.06)  | 3231 | 0.024          |
| <b>Wald p<sup>1</sup></b>                           |          | 0.75                      | 0.46                   | 0.32                   | 0.16                    | 0.018                    | 0.29                   | 0.41                   |      |                |
| <b>All sites, M+F</b>                               |          | -0.03**<br>(-0.06, -0.01) | 0.00<br>(-0.02, 0.03)  | 0.02<br>(0.00, 0.05)   | 0.11***<br>(0.08, 0.13) | 0.01<br>(-0.01, 0.04)    | 0.00<br>(-0.02, 0.02)  | 0.02<br>(-0.00, 0.04)  | 6907 | 0.018          |
| <b>Wald p<sup>2</sup></b>                           |          | 0.31                      | 0.72                   | 0.21                   | 0.056                   | 0.001                    | 0.38                   | 0.80                   |      |                |
| <b>Standard deviation of site-sex heterogeneity</b> |          | 0.00                      | 0.00                   | 0.00                   | 0.02                    | 0.06                     | 0.00                   | 0.00                   |      |                |

\* p < 0.05, \*\* p < 0.01, \*\*\* p < 0.001. <sup>1</sup> p-value for Wald test of site heterogeneity within sex. <sup>2</sup> p-value for Wald test of site-sex heterogeneity.

**Table 12. Association of birth weight (BW), ondional relative weight (CWh), and conditional height (CH) at age 2 y, mid-childhood (MC), and adulthood, with dysglycaemia. Odds ratios and 95% confidence intervals from logistic regression models stratified by site and sex, stratified by sex and adjusted for site, and pooled with adjustment for site and sex.**

|                                                     |          | BW                        | CWh-2y                | CWh-MC               | CWh-Adult               | CH-2y                 | CH-MC                 | CH-Adult             | N    |
|-----------------------------------------------------|----------|---------------------------|-----------------------|----------------------|-------------------------|-----------------------|-----------------------|----------------------|------|
| <b>Brazil</b>                                       | <b>M</b> | 0.89<br>(0.74, 1.07)      | 0.88<br>(0.74, 1.05)  | 1.08<br>(0.92, 1.28) | 1.38**<br>(1.17, 1.64)  | 0.95<br>(0.80, 1.14)  | 0.92<br>(0.77, 1.10)  | 1.08<br>(0.91, 1.28) | 1587 |
|                                                     | <b>F</b> | 0.82<br>(0.66, 1.02)      | 0.93<br>(0.76, 1.14)  | 1.08<br>(0.87, 1.33) | 1.28*<br>(1.05, 1.57)   | 0.98<br>(0.79, 1.21)  | 0.86<br>(0.70, 1.06)  | 0.95<br>(0.77, 1.18) | 1502 |
| <b>Guatemala</b>                                    | <b>M</b> | 0.33<br>(0.10, 1.15)      | 0.61<br>(0.13, 2.84)  | 0.42<br>(0.09, 1.94) | 1.26<br>(0.37, 4.29)    | 0.36<br>(0.09, 1.41)  | 0.49<br>(0.11, 2.23)  | 1.04<br>(0.30, 3.58) | 106  |
|                                                     | <b>F</b> | 1.57<br>(0.41, 5.96)      | 0.73<br>(0.24, 2.20)  | 0.94<br>(0.30, 2.96) | 2.27<br>(0.63, 8.13)    | 0.87<br>(0.33, 2.28)  | 1.43<br>(0.49, 4.15)  | 1.04<br>(0.32, 3.38) | 121  |
| <b>India</b>                                        | <b>M</b> | 0.97<br>(0.81, 1.17)      | 1.09<br>(0.91, 1.32)  | 1.02<br>(0.85, 1.22) | 1.17<br>(0.97, 1.40)    | 1.21*<br>(1.00, 1.46) | 0.85<br>(0.72, 1.02)  | 1.11<br>(0.93, 1.33) | 762  |
|                                                     | <b>F</b> | 0.82<br>(0.63, 1.08)      | 0.74*<br>(0.57, 0.96) | 1.04<br>(0.81, 1.34) | 1.48**<br>(1.15, 1.90)  | 0.93<br>(0.72, 1.21)  | 1.33*<br>(1.03, 1.72) | 0.96<br>(0.74, 1.25) | 539  |
| <b>Philippines</b>                                  | <b>M</b> | 0.80<br>(0.39, 1.66)      | 1.89<br>(0.92, 3.88)  | 1.23<br>(0.66, 2.29) | 1.95<br>(0.97, 3.91)    | 0.95<br>(0.47, 1.91)  | 1.80<br>(0.92, 3.52)  | 0.85<br>(0.42, 1.73) | 869  |
|                                                     | <b>F</b> | 0.88<br>(0.39, 2.00)      | 0.84<br>(0.36, 1.99)  | 1.66<br>(0.84, 3.30) | 1.27<br>(0.63, 2.54)    | 0.57<br>(0.25, 1.30)  | 0.90<br>(0.46, 1.76)  | 0.42<br>(0.19, 0.94) | 709  |
| <b>All sites</b>                                    | <b>M</b> | 0.91<br>(0.80, 1.03)      | 0.99<br>(0.88, 1.12)  | 1.06<br>(0.94, 1.19) | 1.30***<br>(1.15, 1.46) | 1.05<br>(0.92, 1.18)  | 0.90<br>(0.80, 1.01)  | 1.08<br>(0.96, 1.22) | 3324 |
|                                                     |          | <b>Wald p<sup>1</sup></b> | 0.36                  | 0.084                | 0.63                    | 0.34                  | 0.11                  | 0.20                 | 0.85 |
| <b>All sites</b>                                    | <b>F</b> | 0.83*<br>(0.71, 0.98)     | 0.86<br>(0.74, 1.00)  | 1.09<br>(0.93, 1.27) | 1.35***<br>(1.17, 1.57) | 0.93<br>(0.80, 1.09)  | 1.02<br>(0.88, 1.19)  | 0.93<br>(0.79, 1.09) | 2871 |
|                                                     |          | <b>Wald p<sup>1</sup></b> | 0.82                  | 0.59                 | 0.62                    | 0.70                  | 0.69                  | 0.086                | 0.28 |
| <b>All sites, M+F</b>                               |          | 0.88*<br>(0.79, 0.97)     | 0.94<br>(0.85, 1.03)  | 1.07<br>(0.97, 1.18) | 1.32***<br>(1.20, 1.45) | 1.00<br>(0.91, 1.10)  | 0.95<br>(0.86, 1.04)  | 1.03<br>(0.93, 1.13) | 6195 |
|                                                     |          | <b>Wald p<sup>2</sup></b> | 0.69                  | 0.14                 | 0.82                    | 0.65                  | 0.24                  | 0.07                 | 0.43 |
| <b>Standard deviation of site-sex heterogeneity</b> |          | 0.00                      | 0.05                  | 0.00                 | 0.00                    | 0.01                  | 0.09                  | 0.00                 |      |

\* p < 0.05, \*\* p < 0.01, \*\*\* p < 0.001. <sup>1</sup>p-value for Wald test of site heterogeneity within sex. <sup>2</sup>p-value for Wald test of site-sex heterogeneity.



**Table 13. Association of birth weight (BW), conditional relative weight CWh), and conditional height (CH) at age 2 y and mid-childhood (MC), with adult height (cm).  $\beta$ -coefficients and 95% confidence intervals from linear regression models stratified by site and sex, stratified by sex and adjusted for site, and pooled with adjustment for site and sex.**

|                                                     |          | BW                     | CWh-2y                  | CWh-MC                    | CH-2y                  | CH-MC                  | N    | R2    |
|-----------------------------------------------------|----------|------------------------|-------------------------|---------------------------|------------------------|------------------------|------|-------|
| <b>Brazil</b>                                       | <b>M</b> | 1.89***<br>(1.67,2.11) | 0.16<br>(-0.05,0.37)    | -0.25*<br>(-0.46,-0.05)   | 3.52***<br>(3.29,3.76) | 2.00***<br>(1.79,2.21) | 1883 | 0.58  |
|                                                     | <b>F</b> | 1.63***<br>(1.42,1.83) | -0.21*<br>(-0.40,-0.01) | -0.27**<br>(-0.47,-0.07)  | 3.21***<br>(2.98,3.43) | 1.70***<br>(1.50,1.90) | 1701 | 0.573 |
| <b>Guatemala</b>                                    | <b>M</b> | 2.20***<br>(1.52,2.88) | -0.70*<br>(-1.37,-0.02) | 0.31<br>(-0.36,0.98)      | 2.78***<br>(2.09,3.48) | 1.53***<br>(0.73,2.33) | 157  | 0.585 |
|                                                     | <b>F</b> | 1.09**<br>(0.45,1.74)  | -0.11<br>(-0.75,0.52)   | 0.03<br>(-0.56,0.63)      | 2.41***<br>(1.76,3.05) | 1.01**<br>(0.39,1.64)  | 141  | 0.557 |
| <b>India</b>                                        | <b>M</b> | 1.42***<br>(1.09,1.75) | 0.2<br>(-0.12,0.53)     | 0.19<br>(-0.13,0.51)      | 3.08***<br>(2.71,3.44) | 1.35***<br>(1.04,1.66) | 774  | 0.517 |
|                                                     | <b>F</b> | 1.50***<br>(1.16,1.85) | 0.21<br>(-0.13,0.55)    | -0.11<br>(-0.43,0.21)     | 3.23***<br>(2.86,3.61) | 1.45***<br>(1.13,1.77) | 550  | 0.557 |
| <b>Philippines</b>                                  | <b>M</b> | 1.08***<br>(0.85,1.31) | 0.09<br>(-0.13,0.31)    | -0.41***<br>(-0.63,-0.18) | 3.34***<br>(3.08,3.59) | 2.47***<br>(2.24,2.70) | 1004 | 0.642 |
|                                                     | <b>F</b> | 1.29***<br>(1.05,1.52) | 0.19<br>(-0.04,0.41)    | -0.40***<br>(-0.63,-0.18) | 3.05***<br>(2.81,3.29) | 2.11***<br>(1.89,2.33) | 888  | 0.633 |
| <b>South Africa</b>                                 | <b>M</b> | 1.48***<br>(1.01,1.95) | 0.23<br>(-0.24,0.70)    | -0.46*<br>(-0.90,-0.01)   | 3.30***<br>(2.80,3.80) | 2.71***<br>(2.25,3.16) | 573  | 0.501 |
|                                                     | <b>F</b> | 1.10***<br>(0.76,1.45) | 0.09<br>(-0.26,0.44)    | -0.40*<br>(-0.73,-0.08)   | 2.70***<br>(2.35,3.06) | 2.07***<br>(1.73,2.40) | 631  | 0.548 |
| <b>All sites</b>                                    | <b>M</b> | 1.57***<br>(1.43,1.71) | 0.13<br>(-0.01,0.26)    | -0.22**<br>(-0.35,-0.09)  | 3.31***<br>(3.16,3.46) | 2.07***<br>(1.93,2.20) | 4391 | 0.688 |
| <b>Wald p1</b>                                      |          | 0.0001                 | 0.24                    | 0.019                     | 0.16                   | <0.0001                |      |       |
| <b>All sites</b>                                    | <b>F</b> | 1.42***<br>(1.29,1.55) | 0<br>(-0.13,0.12)       | -0.29***<br>(-0.41,-0.17) | 3.04***<br>(2.90,3.17) | 1.80***<br>(1.67,1.92) | 3911 | 0.712 |
| <b>Wald p1</b>                                      |          | 0.039                  | 0.074                   | 0.49                      | 0.031                  | 0.0008                 |      |       |
| <b>All sites, M+F</b>                               |          | 1.49***<br>(1.40,1.59) | 0.06<br>(-0.03,0.16)    | -0.25***<br>(-0.34,-0.16) | 3.18***<br>(3.07,3.28) | 1.94***<br>(1.85,2.03) | 8302 | 0.819 |
| <b>Wald p2</b>                                      |          | <0.0001                | 0.067                   | 0.055                     | 0.004                  | <0.0001                |      |       |
| <b>Standard deviation of site-sex heterogeneity</b> |          | 0.24                   | 0.09                    | 0.10                      | 0.12                   | 0.40                   |      |       |

\* p < 0.05, \*\* p < 0.01, \*\*\* p < 0.001. <sup>1</sup>p-value for Wald test of site heterogeneity within sex. <sup>2</sup>p-value for Wald test of site-sex heterogeneity.

**Table 14. Association of birth weight (BW), conditional relative weight (CWh), and conditional height (CH) at age 2 y and mid-childhood (MC), with short adult stature. Odds ratios and 95% confidence intervals from logistic regression models stratified by site and sex, stratified by sex and adjusted for site, and pooled with adjustment for site and sex.**

|                                                     |          | BW                     | CWh-2y               | CWh-MC                 | CH-2y                  | CH-MC                  | N    |
|-----------------------------------------------------|----------|------------------------|----------------------|------------------------|------------------------|------------------------|------|
| <b>Brazil</b>                                       | <b>M</b> | 0.39***<br>(0.28,0.55) | 0.8<br>(0.59,1.07)   | 1.18<br>(0.91,1.55)    | 0.24***<br>(0.17,0.35) | 0.42***<br>(0.31,0.59) | 1883 |
|                                                     | <b>F</b> | 0.31***<br>(0.21,0.47) | 0.96<br>(0.69,1.33)  | 0.8<br>(0.58,1.10)     | 0.19***<br>(0.12,0.30) | 0.43***<br>(0.30,0.62) | 1701 |
| <b>Guatemala</b>                                    | <b>M</b> | 0.27***<br>(0.15,0.49) | 1.06<br>(0.67,1.67)  | 0.85<br>(0.53,1.35)    | 0.26***<br>(0.15,0.47) | 0.50*<br>(0.28,0.88)   | 157  |
|                                                     | <b>F</b> | 0.40**<br>(0.21,0.75)  | 1.87*<br>(1.00,3.49) | 1.04<br>(0.61,1.77)    | 0.17***<br>(0.08,0.35) | 0.44**<br>(0.26,0.75)  | 141  |
| <b>India</b>                                        | <b>M</b> | 0.50***<br>(0.36,0.69) | 0.92<br>(0.68,1.24)  | 0.9<br>(0.68,1.19)     | 0.28***<br>(0.19,0.41) | 0.51***<br>(0.38,0.69) | 774  |
|                                                     | <b>F</b> | 0.58***<br>(0.42,0.80) | 1.1<br>(0.81,1.49)   | 0.88<br>(0.67,1.16)    | 0.19***<br>(0.13,0.29) | 0.55***<br>(0.41,0.74) | 550  |
| <b>Philippines</b>                                  | <b>M</b> | 0.53***<br>(0.44,0.64) | 0.94<br>(0.79,1.11)  | 1.28**<br>(1.07,1.52)  | 0.20***<br>(0.16,0.26) | 0.31***<br>(0.25,0.38) | 1004 |
|                                                     | <b>F</b> | 0.49***<br>(0.39,0.60) | 0.82*<br>(0.67,0.99) | 1.42***<br>(1.17,1.72) | 0.18***<br>(0.14,0.24) | 0.31***<br>(0.24,0.39) | 888  |
| <b>South Africa</b>                                 | <b>M</b> | 0.39***<br>(0.25,0.61) | 0.98<br>(0.62,1.54)  | 1.25<br>(0.81,1.94)    | 0.18***<br>(0.10,0.33) | 0.21***<br>(0.12,0.35) | 573  |
|                                                     | <b>F</b> | 0.69<br>(0.46,1.02)    | 0.95<br>(0.63,1.42)  | 1.22<br>(0.84,1.76)    | 0.29***<br>(0.17,0.48) | 0.50**<br>(0.33,0.76)  | 631  |
| <b>All sites</b>                                    | <b>M</b> | 0.48***<br>(0.42,0.55) | 0.93<br>(0.82,1.04)  | 1.13*<br>(1.01,1.27)   | 0.24***<br>(0.21,0.28) | 0.38***<br>(0.33,0.43) | 4391 |
| <b>Wald p1</b>                                      |          | 0.14                   | 0.84                 | 0.18                   | 0.58                   | 0.008                  |      |
| <b>All sites</b>                                    | <b>F</b> | 0.50***<br>(0.43,0.57) | 0.95<br>(0.84,1.08)  | 1.13*<br>(1.00,1.28)   | 0.21***<br>(0.17,0.24) | 0.41***<br>(0.36,0.47) | 3911 |
| <b>Wald p1</b>                                      |          | 0.065                  | 0.11                 | 0.01                   | 0.63                   | 0.03                   |      |
| <b>All sites, M+F</b>                               |          | 0.49***<br>(0.44,0.54) | 0.94<br>(0.86,1.03)  | 1.13**<br>(1.04,1.23)  | 0.22***<br>(0.20,0.25) | 0.39***<br>(0.36,0.43) | 8302 |
| <b>Wald p2</b>                                      |          | 0.065                  | 0.43                 | 0.02                   | 0.64                   | 0.002                  |      |
| <b>Standard deviation of site-sex heterogeneity</b> |          | 0.07                   | 0.00                 | 0.16                   | 0.00                   | 0.08                   |      |

\* p < 0.05, \*\* p < 0.01, \*\*\* p < 0.001. <sup>1</sup>p-value for Wald test of site heterogeneity within sex. <sup>2</sup>p-value for Wald test of site-sex heterogeneity.

**Table 15. Association of birth weight (BW), conditional relative weight (CWh), and conditional height (CH) at age 2 y and mid-childhood (MC), with attained schooling (highest grade).  $\beta$ -coefficients and 95% confidence intervals from linear regression models stratified by site and sex, stratified by sex and adjusted for site, and pooled with adjustment for site and sex.**

|                                                     |          | BW                     | CWh-2y                  | CWh-MC                | CH-2y                  | CH-MC                  | N    | R <sup>2</sup> |
|-----------------------------------------------------|----------|------------------------|-------------------------|-----------------------|------------------------|------------------------|------|----------------|
| <b>Brazil</b>                                       | <b>M</b> | 0.26***<br>(0.14,0.39) | 0.17**<br>(0.04,0.29)   | -0.05<br>(-0.17,0.07) | 0.56***<br>(0.44,0.69) | 0.07<br>(-0.05,0.20)   | 1770 | 0.335          |
|                                                     | <b>F</b> | 0.27***<br>(0.15,0.40) | 0.04<br>(-0.08,0.16)    | -0.07<br>(-0.19,0.05) | 0.59***<br>(0.47,0.72) | 0.21***<br>(0.09,0.34) | 1619 | 0.383          |
| <b>Guatemala</b>                                    | <b>M</b> | -0.04<br>(-0.53,0.46)  | -0.51*<br>(-1.00,-0.01) | -0.13<br>(-0.62,0.36) | 0.61*<br>(0.12,1.10)   | 0.4<br>(-0.17,0.96)    | 168  | 0.219          |
|                                                     | <b>F</b> | -0.03<br>(-0.60,0.53)  | -0.32<br>(-0.90,0.26)   | 0.08<br>(-0.45,0.61)  | 0.29<br>(-0.26,0.84)   | 0.51<br>(-0.04,1.05)   | 154  | 0.158          |
| <b>India</b>                                        | <b>M</b> | 0.29*<br>(0.07,0.51)   | 0.25*<br>(0.03,0.48)    | -0.04<br>(-0.26,0.19) | 0.37**<br>(0.13,0.62)  | -0.05<br>(-0.26,0.16)  | 774  | 0.201          |
|                                                     | <b>F</b> | 0.37**<br>(0.11,0.63)  | 0.17<br>(-0.09,0.43)    | -0.04<br>(-0.29,0.20) | 0.53***<br>(0.26,0.80) | 0.18<br>(-0.06,0.42)   | 552  | 0.176          |
| <b>Philippines</b>                                  | <b>M</b> | 0.07<br>(-0.10,0.24)   | 0.16<br>(-0.01,0.32)    | -0.11<br>(-0.28,0.06) | 0.43***<br>(0.24,0.61) | 0.29***<br>(0.13,0.46) | 1006 | 0.255          |
|                                                     | <b>F</b> | 0.13<br>(-0.02,0.28)   | 0.16*<br>(0.00,0.31)    | -0.13<br>(-0.29,0.02) | 0.44***<br>(0.28,0.59) | 0.06<br>(-0.09,0.20)   | 889  | 0.288          |
| <b>South Africa</b>                                 | <b>M</b> | 0.12<br>(-0.00,0.24)   | 0.03<br>(-0.09,0.15)    | -0.06<br>(-0.18,0.05) | 0.12<br>(-0.01,0.24)   | 0.06<br>(-0.06,0.18)   | 568  | 0.068          |
|                                                     | <b>F</b> | 0.16***<br>(0.07,0.26) | -0.02<br>(-0.12,0.07)   | 0.08<br>(-0.01,0.17)  | 0.02<br>(-0.07,0.12)   | 0.01<br>(-0.08,0.10)   | 621  | 0.081          |
| <b>All sites</b>                                    | <b>M</b> | 0.21***<br>(0.13,0.29) | 0.14**<br>(0.05,0.22)   | -0.07<br>(-0.15,0.01) | 0.47***<br>(0.39,0.56) | 0.12**<br>(0.04,0.20)  | 4286 | 0.454          |
| <b>Wald p<sup>1</sup></b>                           |          | 0.20                   | 0.016                   | 0.97                  | 0.014                  | 0.041                  |      |                |
| <b>All sites</b>                                    | <b>F</b> | 0.23***<br>(0.15,0.30) | 0.05<br>(-0.03,0.12)    | -0.04<br>(-0.12,0.04) | 0.45***<br>(0.37,0.53) | 0.17***<br>(0.09,0.25) | 3835 | 0.479          |
| <b>Wald p<sup>1</sup></b>                           |          | 0.22                   | 0.16                    | 0.45                  | <0.0001                | 0.074                  |      |                |
| <b>All sites, M+F</b>                               |          | 0.22***<br>(0.16,0.27) | 0.09**<br>(0.04,0.15)   | -0.05<br>(-0.11,0.00) | 0.46***<br>(0.40,0.52) | 0.14***<br>(0.09,0.20) | 8121 | 0.47           |
| <b>Wald p<sup>2</sup></b>                           |          | 0.21                   | 0.013                   | 0.92                  | <0.0001                | 0.025                  |      |                |
| <b>Standard deviation of site-sex heterogeneity</b> |          | 0.02                   | 0.03                    | 0.03                  | 0.19                   | 0.07                   |      |                |

\* p < 0.05, \*\* p < 0.01, \*\*\* p < 0.001. <sup>1</sup>p-value for Wald test of site heterogeneity within sex. <sup>2</sup>p-value for Wald test of site-sex heterogeneity

**Table 16. Association of birth weight (BW), conditional relative weight (CWh), and conditional height (CH) at age 2 y and mid-childhood (MC), with failure to complete high school. Odds ratios from logistic regression models stratified by site and sex, stratified by sex and adjusted for site, and pooled with adjustment for site and sex.**

|                                                     |          | BW                     | CWh-2y              | CWh-MC                | CH-2y                  | CH-MC                  | N    |
|-----------------------------------------------------|----------|------------------------|---------------------|-----------------------|------------------------|------------------------|------|
| <b>Brazil</b>                                       | <b>M</b> | 0.80***<br>(0.71,0.90) | 0.94<br>(0.84,1.05) | 1.01<br>(0.90,1.13)   | 0.71***<br>(0.63,0.80) | 0.9<br>(0.81,1.01)     | 1770 |
|                                                     | <b>F</b> | 0.79***<br>(0.70,0.89) | 0.9<br>(0.80,1.02)  | 1.03<br>(0.91,1.16)   | 0.64***<br>(0.56,0.73) | 0.84**<br>(0.75,0.95)  | 1619 |
| <b>Guatemala</b>                                    | <b>M</b> | 0.59<br>(0.31,1.15)    | 1.44<br>(0.75,2.78) | 0.74<br>(0.38,1.46)   | 0.45*<br>(0.21,0.97)   | 0.33*<br>(0.13,0.87)   | 168  |
|                                                     | <b>F</b> | 2.36<br>(0.96,5.79)    | 1.42<br>(0.61,3.31) | 1.81<br>(0.83,3.96)   | 0.76<br>(0.35,1.66)    | 0.69<br>(0.29,1.60)    | 154  |
| <b>India</b>                                        | <b>M</b> | 0.73**<br>(0.58,0.93)  | 0.86<br>(0.68,1.08) | 1.04<br>(0.83,1.29)   | 0.86<br>(0.68,1.09)    | 1.04<br>(0.84,1.30)    | 774  |
|                                                     | <b>F</b> | 0.64*<br>(0.42,0.96)   | 0.79<br>(0.54,1.15) | 1.03<br>(0.74,1.42)   | 0.71<br>(0.48,1.05)    | 0.86<br>(0.61,1.21)    | 552  |
| <b>Philippines</b>                                  | <b>M</b> | 0.99<br>(0.85,1.14)    | 0.97<br>(0.83,1.12) | 1.22**<br>(1.05,1.41) | 0.75***<br>(0.63,0.88) | 0.81**<br>(0.70,0.93)  | 1006 |
|                                                     | <b>F</b> | 0.91<br>(0.76,1.09)    | 0.95<br>(0.79,1.13) | 1.06<br>(0.88,1.27)   | 0.72***<br>(0.60,0.87) | 0.86<br>(0.73,1.03)    | 889  |
| <b>South Africa</b>                                 | <b>M</b> | 0.87<br>(0.73,1.03)    | 1.02<br>(0.86,1.21) | 1.04<br>(0.88,1.23)   | 0.92<br>(0.77,1.11)    | 0.89<br>(0.76,1.06)    | 568  |
|                                                     | <b>F</b> | 0.73**<br>(0.60,0.88)  | 1.06<br>(0.87,1.29) | 0.9<br>(0.76,1.08)    | 0.89<br>(0.74,1.08)    | 0.98<br>(0.82,1.17)    | 621  |
| <b>All sites</b>                                    | <b>M</b> | 0.84***<br>(0.78,0.91) | 0.96<br>(0.89,1.03) | 1.06<br>(0.99,1.14)   | 0.76***<br>(0.70,0.82) | 0.88***<br>(0.82,0.95) | 4286 |
| <b>Wald p<sup>1</sup></b>                           |          | 0.21                   | 0.47                | 0.77                  | 0.045                  | 0.22                   |      |
| <b>All sites</b>                                    | <b>F</b> | 0.80***<br>(0.74,0.87) | 0.94<br>(0.87,1.03) | 1.01<br>(0.93,1.10)   | 0.71***<br>(0.65,0.77) | 0.87***<br>(0.80,0.94) | 3835 |
| <b>Wald p<sup>1</sup></b>                           |          | 0.024                  | 0.34                | 0.11                  | 0.043                  | 0.17                   |      |
| <b>All sites, M+F</b>                               |          | 0.82***<br>(0.78,0.87) | 0.95<br>(0.90,1.00) | 1.04<br>(0.99,1.10)   | 0.74***<br>(0.69,0.78) | 0.87***<br>(0.83,0.92) | 8121 |
| <b>Wald p<sup>2</sup></b>                           |          | 0.044                  | 0.51                | 0.40                  | 0.009                  | 0.20                   |      |
| <b>Standard deviation of site-sex heterogeneity</b> |          | 0.02                   | 0.00                | 0.00                  | 0.05                   | 0.00                   |      |

\* p < 0.05, \*\* p < 0.01, \*\*\* p < 0.001. <sup>1</sup>p-value for Wald test of site heterogeneity within sex. <sup>2</sup>p-value for Wald test of site-sex heterogeneity.

**Table 17. Gram or kilogram and centimetre equivalents of birth weight (BW), conditional relative weight (CWh), and conditional height (CH) measures<sup>1</sup> used in the analysis**

|              |         | <b>BW</b> | <b>CWh</b>      | <b>CWh</b>                | <b>CWh</b>        | <b>CH</b>       | <b>CH</b>                 | <b>CH</b>         |
|--------------|---------|-----------|-----------------|---------------------------|-------------------|-----------------|---------------------------|-------------------|
|              |         | (g)       | 2 years<br>(kg) | mid-<br>childhood<br>(kg) | adulthood<br>(kg) | 2 years<br>(cm) | mid-<br>childhood<br>(cm) | adulthood<br>(cm) |
| Brazil       | Females | 546       | .85             | .99                       | 10.3              | 3.46            | 2.39                      | 4.39              |
|              | Males   | 567       | .89             | .99                       | 10.5              | 3.37            | 2.36                      | 4.84              |
| Guatemala    | Females | 469       | .66             | .63                       | 10.2              | 3.56            | 2.19                      | 3.94              |
|              | Males   | 508       | .69             | .71                       | 8.5               | 3.43            | 2.54                      | 4.27              |
| India        | Females | 429       | .81             | .77                       | 11.1              | 3.55            | 2.24                      | 3.99              |
|              | Males   | 451       | .85             | .77                       | 11.3              | 3.52            | 2.08                      | 4.84              |
| Philippines  | Females | 430       | .68             | 1.57                      | 5.4               | 3.44            | 3.88                      | 3.52              |
|              | Males   | 442       | .76             | 1.41                      | 5.8               | 3.48            | 3.71                      | 3.61              |
| South Africa | Females | 498       | 1.24            | .98                       | 9.1               | 3.17            | 2.36                      | 4.42              |
|              | Males   | 515       | 1.29            | 1.07                      | 8.3               | 3.33            | 2.30                      | 5.20              |

<sup>1</sup>Values represent site-specific estimates of the increase in cm, grams, or kg related to one standard deviation of birth weight (BW), conditional relative weight (CWh) or conditional height (CH) from 0-2 years, 2 years to mid-childhood, and mid-childhood to adulthood.

### Appendix Figure 1. Percentage Body Fat

Association of conditional relative weight (CWh) and linear growth (CH) with percentage body fat. Site-specific data points represent  $\beta$  coefficients from linear regression models conducted separately for each site-sex stratum. Pooled estimates from sex-stratified models adjusted for site are presented as  $\beta$  coefficients with 95% confidence intervals. Significant site-sex heterogeneity (noted by the \*) was further assessed in models with males and females and all sites pooled.

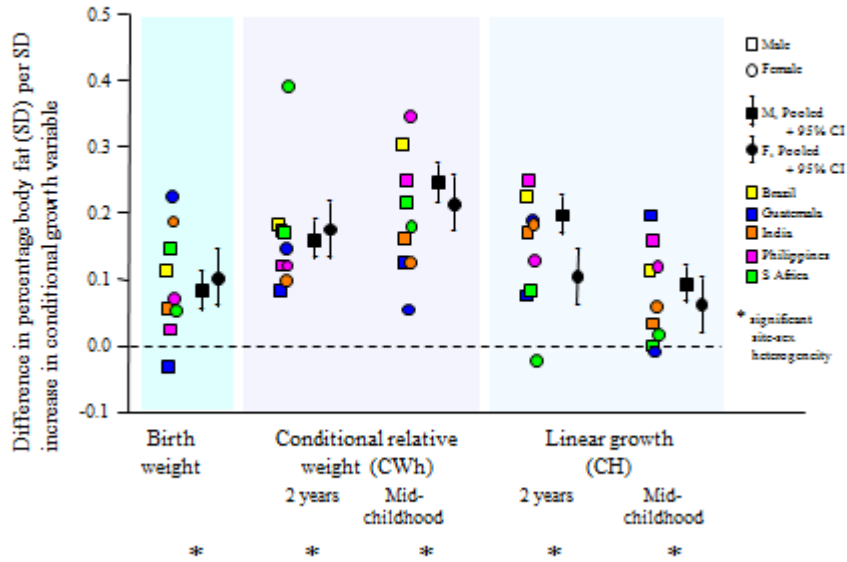

## Appendix Figure 2. Waist Circumference

Association of conditional relative weight (CWh) and linear growth (CH) with waist circumference. Site-specific data points represent  $\beta$  coefficients from linear regression models conducted separately for each site-sex stratum. Pooled estimates from sex-stratified models adjusted for site are presented as  $\beta$  coefficients with 95% confidence intervals. Significant site-sex heterogeneity (noted by the \*) was further assessed in models with males and females and all sites pooled.

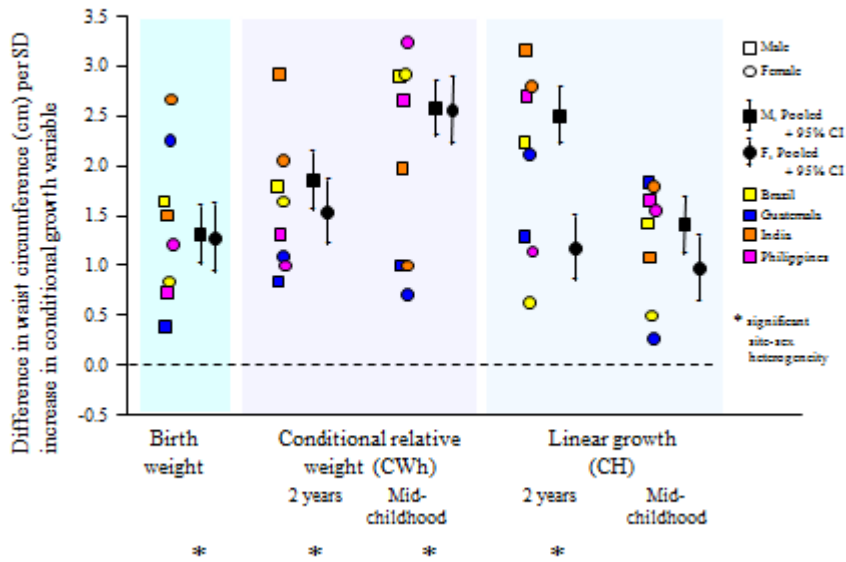

### Appendix Figure 3. Diastolic Blood Pressure

Association of conditional relative weight (CWh) and linear growth (CH) with diastolic blood pressure (mmHg). Site-specific data points represent  $\beta$  coefficients from linear regression models conducted separately for each site-sex stratum. Pooled estimates from sex-stratified models adjusted for site are presented as  $\beta$  coefficients with 95% confidence intervals. Significant site-sex heterogeneity (noted by the \*) was further assessed in models with males and females and all sites pooled.

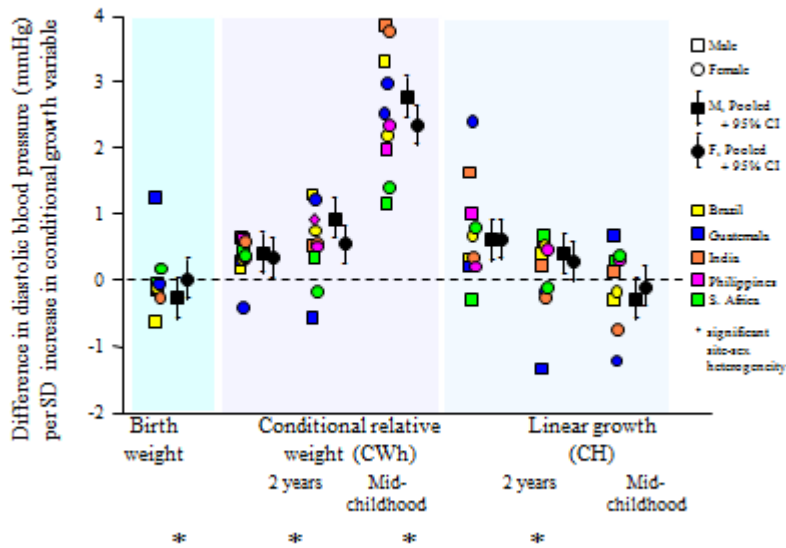

Supplement: mmc1.pdf [file mmc1.pdf]
